# Supplementary material for: Comparative Genomic Analysis of Mycobacterium tuberculosis Drug Resistant Strains from Russia
Source: PLoS One. 2013 Feb 20;8(2):e56577. doi: 10.1371/journal.pone.0056577 (PMC3577857; doi:10.1371/journal.pone.0056577)
Supplement: Table S1 — Individual SNPs identified for CTRI-2(SENS). (XLSX) [file pone.0056577.s001.xlsx]

## Sheet: Лист1
Table S1. Individual SNPs identified for CTRI-2(SENS).
Protein id	Locus tag	PID	COG	COG group	Gene	Gene product	Localization	Position in H37Rv	Position from the beginning of the gene	Strand	H37Rv nucl.	CTRI-2(SENS) nucl.	H37Rv amino acid	CTRI-2(SENS) amino acid	Category
20722	Rv0022c	15607164	-		whiB5	transcriptional regulatory protein WHIB-like WHIB5	Cytoplasmic	27182	261	-	G	A	His	His	synonymous
20732	Rv0032	15607174	COG0156H	H	bioF2	8-amino-7-oxononanoate synthase BioF2	Cytoplasmic	34527	233	+	G	C	Cys	Ser	nsSNP
20745	Rv0045c	15607187	COG0596R	R	-	hydrolase	Cytoplasmic	49080	860	-	A	G	Leu	Pro	nsSNP
20769	Rv0069c	15607211	COG1760E	E	sdaA	L-serine dehydratase SdaA	Cytoplasmic	77058	565	-	T	C	Ile	Val	nsSNP
20844	Rv0143c	15607285	COG0038P	P	-	transmembrane protein	Cytoplasmic Membrane	169321	862	-	C	T	Ala	Thr	nsSNP
20848	Rv0147	15607289	COG1012C	C	-	aldehyde dehydrogenase	Cytoplasmic	173986	749	+	C	T	Pro	Leu	nsSNP
20868	Rv0167	15607308	COG0767Q	Q	yrbE1A	integral membrane protein YRBE1A	Cytoplasmic Membrane	197289	429	+	C	T	His	His	synonymous
20904	Rv0202c	15607343	COG2409R	R	mmpL11	transmembrane transport protein MmpL11	Cytoplasmic Membrane	239059	2234	-	C	T	Arg	Gln	nsSNP
20929	Rv0227c	15607368	-		-	hypothetical protein	Unknown	272267	573	-	A	G	Gly	Gly	synonymous
20932	Rv0230c	15607371	COG1735R	R	php	phosphotriesterase	Cytoplasmic Membrane	275009	955	-	A	C	Phe	Val	nsSNP
20932	Rv0230c	15607371	COG1735R	R	php	phosphotriesterase	Cytoplasmic Membrane	275634	330	-	G	A	Leu	Leu	synonymous
20938	Rv0236c	15607377	-		-	transmembrane protein	Cytoplasmic Membrane	286415	437	-	A	T	Met	Lys	nsSNP
20947	Rv0244c	15607385	COG1960I	I	fadE5	acyl-CoA dehydrogenase FADE5	Cytoplasmic	294841	793	-	C	G	Ala	Pro	nsSNP
20976	Rv0273c	15607414	COG1309K	K	-	transcriptional regulatory protein	Cytoplasmic	329826	500	-	C	T	Cys	Tyr	nsSNP
20987	Rv0284	15607425	COG1674D	D	-	hypothetical protein	Cytoplasmic Membrane	348304	2670	+	C	T	Arg	Arg	synonymous
21029	Rv0326	15607467	-		-	hypothetical protein	Cytoplasmic	392479	207	+	G	C	Glu	Asp	nsSNP
21045	Rv0342	15607483	COG0699R	R	iniA	isoniazid inductible gene protein INIA	Cytoplasmic	412339	1502	+	C	G	Ser	Trp	nsSNP
21076	Rv0373c	15607514	COG1529C	C	-	carbon monoxyde dehydrogenase large subunit	Cytoplasmic	450640	1164	-	C	T	Ala	Ala	synonymous
21092	Rv0389	15607530	COG0027F	F	purT	phosphoribosylglycinamide formyltransferase 2	Cytoplasmic Membrane	468582	248	+	T	C	Val	Ala	nsSNP
21108	Rv0405	15607546	COG3321Q	Q	pks6	membrane bound polyketide synthase	Cytoplasmic Membrane	488037	2307	+	G	T	Glu	Asp	nsSNP
21199	Rv0493c	15607634	-		-	hypothetical protein	Unknown	584017	674	-	A	G	Ile	Thr	nsSNP
21216	Rv0508	15607649	-		-	hypothetical protein	Cytoplasmic	600116	19	+	G	A	Glu	Lys	nsSNP
21253	Rv0545c	15607685	COG0306P	P	pitA	inorganic phosphate transporter	Cytoplasmic Membrane	636451	1013	-	G	T	Ala	Glu	nsSNP
21274	Rv0566c	15607706	COG1666S	S	-	putative nucleotide-binding protein	Cytoplasmic	657895	145	-	C	T	Val	Ile	nsSNP
21383	Rv0671	15607811	COG3509Q	Q	lpqP	lipoprotein LpqP	Unknown	771273	692	+	A	G	Asp	Gly	nsSNP
21489	Rv0774c	57116780	COG0627R	R	-	hypothetical protein	Cytoplasmic Membrane	868174	178	-	C	T	Asp	Asn	nsSNP
21533	Rv0817c	15607957	-		-	hypothetical protein	Cytoplasmic	910348	495	-	C	A	Leu	Leu	synonymous
21588	Rv0872c	57116793	-		PE_PGRS15	PE-PGRS family protein	Extracellular	969120	1125	-	G	A	Gly	Gly	synonymous
21699	Rv0983	15608123	COG0265O	O	pepD	serine protease PepD	Unknown	1099691	626	+	G	C	Ser	Thr	nsSNP
21701	Rv0985c	15608125	COG1970M	M	mscL	large-conductance mechanosensitive channel	Cytoplasmic Membrane	1101205	276	-	C	T	Leu	Leu	synonymous
21751	Rv1034c	15608174	COG3039L	L	-	transposase	Unknown	1159119	189	-	C	T	Gln	Gln	synonymous
21751	Rv1034c	15608174	COG3039L	L	-	transposase	Unknown	1159162	146	-	C	G	Gly	Ala	nsSNP
21756	Rv1039c	57116813	COG5651N	N	PPE15	PPE family protein	Cytoplasmic Membrane	1161721	752	-	A	T	Val	Asp	nsSNP
21844	Rv1124	15608264	COG0596R	R	ephC	epoxide hydrolase EphC	Cytoplasmic	1248059	933	+	C	T	Phe	Phe	synonymous
21847	Rv1127c	15608267	COG0574G	G	ppdK	pyruvate phosphate dikinase	Cytoplasmic	1251033	372	-	G	A	Gly	Gly	synonymous
21894	Rv1173	15608313	COG1060HR	HR	fbiC	FO synthase	Cytoplasmic	1303095	165	+	G	A	Leu	Leu	synonymous
21969	Rv1248c	161352467	COG0567C	C	kgd	alpha-ketoglutarate decarboxylase		1392169	884	-	C	T	Ser	Asn	nsSNP
22068	Rv1345	15608485	COG0318IQ	IQ	fadD33	long-chain-fatty-acid--[acyl-carrier-protein] ligase	Cytoplasmic Membrane	1510563	1283	+	C	A	Thr	Lys	nsSNP
22122	Rv1399c	15608537	COG0657I	I	lipH	lipase LipH	Cytoplasmic	1575783	27	-	A	C	Pro	Pro	synonymous
22220	Rv1495	15608633	COG2337T	T	-	hypothetical protein	Unknown	1686753	184	+	G	C	Gly	Arg	nsSNP
22222	Rv1497	15608635	COG1680V	V	lipL	esterase LipL	Cytoplasmic Membrane	1688024	84	+	G	C	Ala	Ala	synonymous
22235	Rv1508c	15608646	-		-	hypothetical protein	Cytoplasmic Membrane	1698368	1527	-	C	T	Pro	Pro	synonymous
22248	Rv1520	15608658	COG0463M	M	-	sugar transferase	Cytoplasmic	1711588	561	+	C	G	Gly	Gly	synonymous
22276	Rv1548c	57116882	COG5651N	N	PPE21	PPE family protein	Cellwall	1752992	342	-	T	C	Arg	Arg	synonymous
22292	Rv1564c	57116886	COG1523G	G	treX	maltooligosyltrehalose synthase TreX	Cytoplasmic	1770906	696	-	C	A	Leu	Leu	synonymous
22327	Rv1599	15608737	COG0141E	E	hisD	histidinol dehydrogenase	Unknown	1800340	758	+	C	T	Thr	Ile	nsSNP
22355	Rv1627c	15608765	COG0183I	I	-	lipid-transfer protein	Cytoplasmic	1829645	429	-	C	G	Gly	Gly	synonymous
22357	Rv1629	15608767	COG0749L	L	polA	DNA polymerase I	Cytoplasmic	1831340	676	+	C	T	Arg	Trp	nsSNP
22358	Rv1630	15608768	COG0539J	J	rpsA	30S ribosomal protein S1	Cytoplasmic	1834836	1295	+	T	C	Met	Thr	nsSNP
22397	Rv1668c	15608806	COG0488R	R	-	macrolide-transport ATP-binding protein ABC transporter	Cytoplasmic	1894878	465	-	G	A	Ile	Ile	synonymous
22477	Rv1747	15608885	COG1131V	V	-	transmembrane ATP-binding protein ABC transporter	Cytoplasmic Membrane	1974926	1297	+	G	T	Val	Leu	nsSNP
22490	Rv1760	15608898	-		-	hypothetical protein	Cytoplasmic	1994629	1477	+	C	G	Gln	Glu	nsSNP
22498	Rv1767	15608905	COG0599S	S	-	hypothetical protein	Cytoplasmic	2000385	312	+	T	A	Ala	Ala	synonymous
22518	Rv1787	57116909	COG5651N	N	PPE25	PPE family protein	Cytoplasmic Membrane	2026163	863	+	C	G	Ala	Gly	nsSNP
22570	Rv1840c	57116924	-		PE_PGRS34	PE-PGRS family protein	Unknown	2088442	1077	-	G	A	Gly	Gly	synonymous
22594	Rv1864c	15609001	COG2258S	S	-	hypothetical protein	Cytoplasmic	2111513	597	-	C	T	Glu	Glu	synonymous
22603	Rv1873	15609010	COG5579S	S	-	hypothetical protein	Unknown	2123181	8	+	C	T	Ser	Leu	nsSNP
22607	Rv1877	15609014	COG2814G	G	-	integral membrane protein	Cytoplasmic Membrane	2126259	356	+	C	T	Ala	Val	nsSNP
22640	Rv1909c	15609046	COG0735P	P	furA	ferric uptake regulation protein furA (fur)	Cytoplasmic	2156196	406	-	G	A	Leu	Leu	synonymous
22653	Rv1922	15609059	COG1680V	V	-	lipoprotein	Extracellular	2174993	927	+	C	G	Gly	Gly	synonymous
22718	Rv1987	15609124	-		-	chitinase	Cytoplasmic Membrane	2231100	75	+	C	T	Ala	Ala	synonymous
22757	Rv2025c	15609162	COG0053P	P	-	hypothetical protein	Cytoplasmic Membrane	2271187	562	-	C	T	Asp	Asn	nsSNP
22784	Rv2052c	15609189	COG1574R	R	-	hypothetical protein	Unknown	2311233	1285	-	C	T	Ala	Thr	nsSNP
22791	Rv2059	15609196	COG0803P	P	-	hypothetical protein	Unknown	2315748	575	+	A	C	Asp	Ala	nsSNP
22881	Rv2150c	15609287	COG0206D	D	ftsZ	cell division protein FtsZ	Cytoplasmic	2408999	526	-	G	A	Leu	Leu	synonymous
22901	Rv2169c	15609306	-		-	transmembrane protein	Cytoplasmic Membrane	2431647	323	-	G	A	Ser	Leu	nsSNP
22923	Rv2191	15609328	COG0322L	L	-	hypothetical protein	Cytoplasmic	2453879	61	+	G	A	Asp	Asn	nsSNP
22973	Rv2241	15609378	COG2609C	C	aceE	pyruvate dehydrogenase subunit E1	Cytoplasmic	2513886	1348	+	G	C	Ala	Arg	nsSNP
22973	Rv2241	15609378	COG2609C	C	aceE	pyruvate dehydrogenase subunit E1	Cytoplasmic	2513887	1349	+	C	G	Ala	Arg	nsSNP
23031	Rv2298	15609435	COG0667C	C	-	hypothetical protein	Cytoplasmic	2569934	853	+	G	T	Asp	Tyr	nsSNP
23090	Rv2351c	15609488	COG3511M	M	plcA	membrane-associated phospholipase C	Cytoplasmic Membrane	2630946	1130	-	C	G	Gly	Ala	nsSNP
23095	Rv2356c	57116976	-		PPE40	PPE family protein	Extracellular	2638997	539	-	G	A	Ser	Leu	nsSNP
23110	Rv2371	57116979	-		PE_PGRS40	PE-PGRS family protein	Cytoplasmic Membrane	2651869	117	+	C	T	Ser	Ser	synonymous
23188	Rv2447c	15609584	COG0285H	H	folC	folylpolyglutamate synthase protein FolC	Cytoplasmic	2746340	1259	-	G	A	Ala	Val	nsSNP
23202	Rv2461c	57116992	COG0740OU	OU	clpP	ATP-dependent Clp protease proteolytic subunit	Cytoplasmic	2763469	306	-	G	A	Phe	Phe	synonymous
23214	Rv2473	15609610	-		-	alanine and proline rich membrane protein	Unknown	2775938	371	+	A	C	Gln	Pro	nsSNP
23262	Rv2521	15609658	COG1225O	O	bcp	bacterioferritin comigratory protein BCP	Unknown	2837929	246	+	T	C	Ala	Ala	synonymous
23265	Rv2524c	15609661	COG4982I	I	fas	fatty acid synthase	Cytoplasmic Membrane	2840869	8464	-	C	T	Ala	Thr	nsSNP
23285	Rv2543	15609680	-		lppA	lipoprotein LppA	Cytoplasmic	2866919	452	+	C	T	Ala	Val	nsSNP
23344	Rv2601A	57117004	COG4691R	R	-	hypothetical protein	Unknown	2930185	116	+	C	T	Ser	Phe	nsSNP
23360	Rv2616	15609753	COG4762S	S	-	hypothetical protein	Unknown	2945518	189	+	G	T	Arg	Arg	synonymous
23401	Rv2657c	15609794	-		-	phiRv2 prophage protein	Unknown	2979141	169	-	G	C	Arg	Gly	nsSNP
23424	Rv2680	15609817	-		-	hypothetical protein	Cytoplasmic	2996569	465	+	C	T	Gly	Gly	synonymous
23462	Rv2718c	15609855	COG1327K	K	nrdR	transcriptional regulator NrdR	Cytoplasmic	3030594	284	-	G	A	Ala	Val	nsSNP
23513	Rv2768c	57117022	COG5651N	N	PPE43	PPE family protein	Cytoplasmic Membrane	3077790	289	-	A	G	Phe	Leu	nsSNP
23538	Rv2793c	15609930	COG0130J	J	truB	tRNA pseudouridine synthase B	Cytoplasmic	3102800	461	-	T	G	Glu	Ala	nsSNP
23681	Rv2935	15610072	COG3321Q	Q	ppsE	phenolpthiocerol synthesis type-I polyketide synthase PPSE	Cytoplasmic Membrane	3272123	4387	+	A	C	Thr	Pro	nsSNP
23714	Rv2967c	15610104	COG1038C	C	pca	pyruvate carboxylase	Cytoplasmic	3320128	2919	-	G	A	His	His	synonymous
23723	Rv2975c	15610112	COG1461R	R	-	hypothetical protein	Unknown	3331535	78	-	G	A	Leu	Leu	synonymous
23790	Rv3040c	15610177	-		-	hypothetical protein	Cytoplasmic	3400627	432	-	C	G	Thr	Thr	synonymous
23830	Rv3080c	15610217	COG2909K	K	pknK	serine/threonine-protein kinase transcriptional regulatory protein	Cytoplasmic Membrane	3443144	2845	-	T	C	Ile	Val	nsSNP
23841	Rv3091	15610228	-		-	hypothetical protein	Cytoplasmic	3460419	1304	+	A	G	Tyr	Cys	nsSNP
23922	Rv3173c	15610309	COG1309K	K	-	TetR/ACRR family transcriptional regulator	Unknown	3541478	568	-	C	T	Val	Ile	nsSNP
23952	Rv3200c	15610336	COG0569P	P	-	transmembrane cation transporter	Cytoplasmic Membrane	3572800	870	-	A	G	Asp	Asp	synonymous
23981	Rv3225c	15610361	COG3173R	R	-	transferase	Cytoplasmic	3601494	947	-	G	A	Pro	Leu	nsSNP
23987	Rv3231c	15610367	-		-	hypothetical protein	Unknown	3608751	123	-	G	A	Ala	Ala	synonymous
23998	Rv3242c	15610378	COG1040R	R	-	hypothetical protein	Cytoplasmic Membrane	3621770	442	-	G	A	Arg	Trp	nsSNP
24039	Rv3283	15610419	COG2897P	P	sseA	thiosulfate sulfurtransferase SseA	Cytoplasmic	3665611	684	+	G	A	Leu	Leu	synonymous
24053	Rv3297	15610433	COG0266L	L	nei	endonuclease VIII	Cytoplasmic	3682023	704	+	C	T	Thr	Met	nsSNP
24090	Rv3333c	15610469	-		-	hypothetical protein	Unknown	3720053	730	-	C	G	Gly	Arg	nsSNP
24098	Rv3341	15610477	COG2021E	E	metX	homoserine O-acetyltransferase	Cytoplasmic	3727760	273	+	C	T	Asp	Asp	synonymous
24100	Rv3343c	57117092	COG5651N	N	PPE54	PPE family protein	Cytoplasmic Membrane	3735198	1738	-	T	G	Ile	Leu	nsSNP
24102	Rv3345c	57117094	-		PE_PGRS50	PE-PGRS family protein	Extracellular	3742133	642	-	G	T	Ala	Ala	synonymous
24117	Rv3360	15610496	COG1716T	T	-	hypothetical protein	Unknown	3772884	234	+	C	T	Val	Val	synonymous
24161	Rv3403c	15610539	COG4529S	S	-	hypothetical protein	Cytoplasmic	3822690	1174	-	C	T	Ala	Thr	nsSNP
24205	Rv3447c	15610583	COG1674D	D	-	hypothetical protein	Cytoplasmic Membrane	3867369	870	-	G	A	Ala	Ala	synonymous
24209	Rv3451	57117108	-		cut3	cutinase precursor CUT3	Cytoplasmic Membrane	3873224	608	+	T	G	Phe	Cys	nsSNP
24212	Rv3454	15610590	COG1457F	F	-	integral membrane protein	Cytoplasmic Membrane	3875511	690	+	G	A	Ala	Ala	synonymous
24230	Rv3472	15610608	-		-	hypothetical protein	Cytoplasmic	3889569	208	+	C	T	Arg	Cys	nsSNP
24253	Rv3495c	15610631	COG1463Q	Q	lprN	MCE-family lipoprotein LprN	Unknown	3913455	1080	-	A	G	Ile	Ile	synonymous
24264	Rv3506	15610642	COG0318IQ	IQ	fadD17	acyl-CoA synthetase	Cytoplasmic	3926151	1262	+	C	A	Pro	Gln	nsSNP
24267	Rv3509c	15610645	COG0028EH	EH	ilvX	hypothetical protein	Cytoplasmic	3938168	257	-	G	A	Ala	Val	nsSNP
24338	Rv3579c	15610715	COG0566J	J	-	tRNA/rRNA methyltransferase	Unknown	4022129	265	-	G	A	Leu	Leu	synonymous
24344	Rv3585	15610721	COG1066O	O	radA	DNA repair protein RadA	Cytoplasmic	4026593	150	+	G	A	Val	Val	synonymous
24345	Rv3586	15610722	COG1623R	R	-	DNA integrity scanning protein DisA	Cytoplasmic	4028931	1041	+	G	A	Leu	Leu	synonymous
24350	Rv3591c	15610727	COG0596R	R	-	hydrolase	Cytoplasmic	4033803	240	-	C	G	Leu	Leu	synonymous
24355	Rv3596c	57117131	COG0542O	O	clpC1	ATP-dependent protease ATP-binding subunit ClpC1	Cytoplasmic	4038968	1737	-	C	T	Gln	Gln	synonymous
24418	Rv3659c	57117141	COG4962U	U	-	hypothetical protein	Cytoplasmic	4096985	1010	-	T	G	Asp	Ala	nsSNP
24472	Rv3711c	15610847	COG0847L	L	dnaQ	DNA polymerase III subunit epsilon	Cytoplasmic	4156467	263	-	A	G	Val	Ala	nsSNP
24525	Rv3763	15610899	-		lpqH	19 kDa lipoprotein antigen precursor LPQH	Unknown	4209389	343	+	G	A	Gly	Ser	nsSNP
24525	Rv3763	15610899	-		lpqH	19 kDa lipoprotein antigen precursor LPQH	Unknown	4209511	465	+	G	C	Glu	Asp	nsSNP
24620	Rv3856c	15610992	COG1387ER	ER	-	hypothetical protein	Cytoplasmic	4328774	635	-	C	G	Arg	Pro	nsSNP
24645	Rv3881c	15611017	-		-	hypothetical protein	Cytoplasmic	4361799	127	-	T	G	Lys	Gln	nsSNP
24652	Rv3888c	15611024	COG0455D	D	-	hypothetical protein	Cytoplasmic	4371779	928	-	C	A	Val	Leu	nsSNP
24667	Rv3903c	15611039	-		-	hypothetical protein	Unknown	4388606	1827	-	G	A	Thr	Thr	synonymous
24673	Rv3909	15611045	-		-	hypothetical protein	Cytoplasmic Membrane	4394450	259	+	G	C	Val	Leu	nsSNP
24674	Rv3910	15611046	COG0728R	R	-	transmembrane protein	Cytoplasmic Membrane	4397368	772	+	A	C	Met	Leu	nsSNP
