# Supplementary material for: Comparative Genomic Analysis of Mycobacterium tuberculosis Drug Resistant Strains from Russia
Source: PLoS One. 2013 Feb 20;8(2):e56577. doi: 10.1371/journal.pone.0056577 (PMC3577857; doi:10.1371/journal.pone.0056577)
Supplement: Table S2 — Individual SNPs identified for CTRI-3(MDR). (XLSX) [file pone.0056577.s002.xlsx]

## Sheet: Лист1
Table S2. Individual SNPs identified for CTRI-3(MDR).
Protein id	Locus tag	PID	COG	COG group	Gene	Gene product	Localization	Position in H37Rv	Position from the beginning of the gene	Strand	H37Rv nucl.	CTRI-3(MDR) nucl.	H37Rv amino acid	CTRI-3(MDR) amino acid	Category
20713	Rv0013	57116682	COG0512EH	EH	trpG	para-aminobenzoate synthase component II	Cytoplasmic	15517	604	+	C	G	Arg	Gly	nsSNP
20737	Rv0037c	15607179	-		-	integral membrane protein	Cytoplasmic Membrane	40237	966	-	G	A	Tyr	Tyr	synonymous
20741	Rv0041	15607183	COG0495J	J	leuS	leucyl-tRNA synthetase	Cytoplasmic	43722	161	+	C	T	Pro	Leu	nsSNP
20744	Rv0044c	15607186	COG2141C	C	-	oxidoreductase	Unknown	48767	261	-	G	C	Ser	Ser	synonymous
20761	Rv0061	15607203	-		-	hypothetical protein	Cytoplasmic Membrane	65394	404	+	C	A	Ala	Glu	nsSNP
20769	Rv0069c	15607211	COG1760E	E	sdaA	L-serine dehydratase SdaA	Cytoplasmic	76530	1093	-	G	T	Pro	Thr	nsSNP
20773	Rv0073	15607215	COG1136V	V	-	glutamine-transport ATP-binding protein ABC transporter	Cytoplasmic Membrane	81990	315	+	C	A	Asn	Lys	nsSNP
20775	Rv0075	15607217	COG1168E	E	-	aminotransferase	Cytoplasmic	84832	837	+	C	T	Ala	Arg	nsSNP
20783	Rv0082	15607224	COG3260C	C	-	oxidoreductase	Cytoplasmic Membrane	89986	63	+	G	A	Pro	Pro	synonymous
20785	Rv0084	15607226	COG0650C	C	hycD	formate hydrogenlyase HYCD	Cytoplasmic Membrane	92380	53	+	C	T	Pro	Leu	nsSNP
20793	Rv0092	15607234	COG2217P	P	ctpA	cation transporter P-type ATPase A	Cytoplasmic Membrane	101092	510	+	C	A	Val	Val	synonymous
20794	Rv0093c	15607235	COG5660S	S	-	hypothetical protein	Cytoplasmic Membrane	102908	756	-	C	T	Ala	Ala	synonymous
20794	Rv0093c	15607235	COG5660S	S	-	hypothetical protein	Cytoplasmic Membrane	103181	483	-	A	G	Gly	Gly	synonymous
20808	Rv0107c	15607249	COG0474P	P	ctpI	cation-transporter ATPase I	Cytoplasmic Membrane	130530	12	-	C	T	Pro	Pro	synonymous
20810	Rv0109	57116691	-		PE_PGRS1	PE-PGRS family protein	Cytoplasmic Membrane	131987	606	+	G	C	Gly	Gly	synonymous
20810	Rv0109	57116691	-		PE_PGRS1	PE-PGRS family protein	Cytoplasmic Membrane	131988	607	+	C	A	Pro	Thr	nsSNP
20828	Rv0127	15607269	COG3281G	G	-	hypothetical protein	Cytoplasmic	154882	651	+	C	T	Asn	Asn	synonymous
20828	Rv0127	15607269	COG3281G	G	-	hypothetical protein	Cytoplasmic	155257	1026	+	C	T	Gly	Gly	synonymous
20834	Rv0133	15607275	COG3153R	R	-	acetyltransferase	Cytoplasmic	161179	311	+	G	A	Arg	Gln	nsSNP
20853	Rv0152c	57116695	-		PE2	PE family protein	Cytoplasmic Membrane	180810	87	-	T	G	Thr	Thr	synonymous
20859	Rv0158	15607300	COG1309K	K	-	TetR family transcriptional regulator	Cytoplasmic Membrane	187363	579	+	G	A	Leu	Leu	synonymous
20873	Rv0172	15607313	COG1463Q	Q	mce1D	MCE-family protein MCE1D	Unknown	202675	200	+	T	C	Ile	Thr	nsSNP
20874	Rv0173	15607314	COG1463Q	Q	lprK	MCE-family lipoprotein LprK	Cytoplasmic Membrane	204630	566	+	G	A	Arg	Gln	nsSNP
20887	Rv0186	15607327	COG1472G	G	bglS	beta-glucosidase	Cytoplasmic	217306	1038	+	C	G	Val	Val	synonymous
20895	Rv0193c	15607334	-		-	hypothetical protein	Cytoplasmic	225344	1228	-	C	T	Glu	Lys	nsSNP
20958	Rv0255c	57116707	COG1492H	H	cobQ1	cobyric acid synthase	Cytoplasmic	306639	1220	-	T	C	Glu	Gly	nsSNP
20965	Rv0262c	15607403	-		aac	aminoglycoside 2'-N-acetyltransferase AAC (AAC(2')-IC)	Unknown	314338	517	-	A	G	Cys	Arg	nsSNP
20969	Rv0266c	15607407	COG0146EQ	EQ	oplA	5-oxoprolinase	Cytoplasmic	317540	3615	-	G	C	Ala	Ala	synonymous
20973	Rv0270	15607411	COG0318IQ	IQ	fadD2	acyl-CoA synthetase	Cytoplasmic	325647	1081	+	C	T	Pro	Ser	nsSNP
20982	Rv0279c	57116713	-		PE_PGRS4	PE-PGRS family protein	Unknown	337570	1504	-	T	C	Thr	Ala	nsSNP
20982	Rv0279c	57116713	-		PE_PGRS4	PE-PGRS family protein	Unknown	337598	1476	-	T	G	Arg	Arg	synonymous
20982	Rv0279c	57116713	-		PE_PGRS4	PE-PGRS family protein	Unknown	338960	114	-	T	C	Ala	Ala	synonymous
20982	Rv0279c	57116713	-		PE_PGRS4	PE-PGRS family protein	Unknown	338963	111	-	T	C	Thr	Thr	synonymous
20985	Rv0282	15607423	COG0464O	O	-	hypothetical protein	Cytoplasmic	343932	1803	+	C	T	Phe	Phe	synonymous
20993	Rv0290	15607431	-		-	transmembrane protein	Cytoplasmic Membrane	353871	789	+	G	A	Pro	Pro	synonymous
20994	Rv0291	15607432	COG1404O	O	mycP3	membrane-anchored mycosin	Cytoplasmic Membrane	355803	1306	+	G	T	Ala	Ser	nsSNP
21007	Rv0304c	57116719	-		PPE5	PPE family protein	Cellwall	367824	4941	-	A	G	Ser	Ser	synonymous
21007	Rv0304c	57116719	-		PPE5	PPE family protein	Cellwall	368079	4686	-	A	G	Thr	Thr	synonymous
21012	Rv0309	15607450	COG3786S	S	-	hypothetical protein	Unknown	378407	477	+	G	T	Gln	His	nsSNP
21030	Rv0327c	15607468	COG2124Q	Q	cyp135A1	cytochrome P450 135A1	Cytoplasmic	393952	94	-	G	A	Leu	Leu	synonymous
21035	Rv0332	15607473	-		-	hypothetical protein	Cytoplasmic	397894	453	+	G	A	Pro	Pro	synonymous
21042	Rv0339c	15607480	COG2197TK	TK	-	transcriptional regulatory protein	Cytoplasmic	407877	572	-	T	C	Glu	Gly	nsSNP
21055	Rv0352	57116724	COG0484O	O	dnaJ1	chaperone protein DnaJ1	Cytoplasmic	422879	428	+	G	A	Arg	His	nsSNP
21056	Rv0353	15607494	COG0789K	K	hspR	HEAT shock protein transcriptional repressor HspR	Cytoplasmic	423722	84	+	C	T	Thr	Thr	synonymous
21058	Rv0355c	57116726	COG5651N	N	PPE8	PPE family protein	Cytoplasmic Membrane	433515	1165	-	G	A	Leu	Leu	synonymous
21066	Rv0363c	15607504	COG0191G	G	fba	fructose-bisphosphate aldolase	Cytoplasmic	441589	711	-	C	T	Lys	Lys	synonymous
21068	Rv0365c	15607506	COG4833G	G	-	hypothetical protein	Cytoplasmic Membrane	443547	651	-	C	T	Leu	Leu	synonymous
21073	Rv0370c	15607511	COG0714R	R	-	oxidoreductase	Cytoplasmic	447411	633	-	G	T	Arg	Arg	synonymous
21107	Rv0404	15607545	COG0318IQ	IQ	fadD30	acyl-CoA synthetase	Unknown	485584	1608	+	G	A	Ala	Ala	synonymous
21114	Rv0411c	15607552	COG0834ET	ET	glnH	glutamine-binding lipoprotein	Cytoplasmic Membrane	497682	619	-	C	G	Val	Leu	nsSNP
21121	Rv0418	15607559	COG2234R	R	lpqL	lipoprotein aminopeptidase LpqL	Extracellular	503875	380	+	G	C	Arg	Thr	nsSNP
21121	Rv0418	15607559	COG2234R	R	lpqL	lipoprotein aminopeptidase LpqL	Extracellular	504504	1009	+	G	C	Gly	Arg	nsSNP
21153	Rv0450c	15607591	COG2409R	R	mmpL4	transmembrane transport protein MmpL4	Cytoplasmic Membrane	541262	230	-	A	G	Val	Ala	nsSNP
21166	Rv0462	15607603	COG1249C	C	lpd	dihydrolipoamide dehydrogenase	Cytoplasmic	553613	1000	+	G	T	Ala	Ser	nsSNP
21201	Rv0495c	15607636	-		-	hypothetical protein	Cytoplasmic	585891	424	-	C	G	Glu	Gln	nsSNP
21208	Rv0500B	57116744	-		-	hypothetical protein	Unknown	591505	31	+	C	A	Arg	Ser	nsSNP
21209	Rv0501	57116745	COG0451MG	MG	galE2	UDP-glucose 4-epimerase	Cytoplasmic	592702	1049	+	T	C	Val	Ala	nsSNP
21225	Rv0517	15607658	COG1835I	I	-	membrane acyltransferase	Cytoplasmic Membrane	609254	509	+	C	T	Pro	Leu	nsSNP
21286	Rv0578c	57116755	-		PE_PGRS7	PE-PGRS family protein	Extracellular	672140	3777	-	A	G	Gly	Gly	synonymous
21296	Rv0588	15607728	COG0767Q	Q	yrbE2B	integral membrane protein YrbE2b	Cytoplasmic Membrane	686794	867	+	G	C	Pro	Pro	synonymous
21332	Rv0622	57116762	-		-	hypothetical protein	Unknown	715591	222	+	A	C	Glu	Asp	nsSNP
21356	Rv0644c	15607784	COG2230M	M	mmaA2	methoxy mycolic acid synthase	Cytoplasmic	738902	259	-	C	T	Asp	Asn	nsSNP
21369	Rv0657c	15607797	COG5450K	K	-	hypothetical protein	Cytoplasmic	753562	56	-	A	G	Ile	Thr	nsSNP
21375	Rv0663	15607803	COG3119P	P	atsD	arylsulfatase AtsD	Cytoplasmic	756216	80	+	A	G	Asp	Gly	nsSNP
21375	Rv0663	15607803	COG3119P	P	atsD	arylsulfatase AtsD	Cytoplasmic	758322	2186	+	A	G	Asp	Gly	nsSNP
21379	Rv0667	15607807	COG0085K	K	rpoB	DNA-directed RNA polymerase subunit beta	Cytoplasmic	761110	1304	+	A	T	Asp	Val	nsSNP
21396	Rv0684	57116768	COG0480J	J	fusA1	elongation factor G	Cytoplasmic	783601	1117	+	A	C	Arg	Arg	synonymous
21408	Rv0696	15607836	COG1215M	M	-	membrane sugar transferase	Cytoplasmic	795991	473	+	T	G	Phe	Cys	nsSNP
21424	Rv0712	15607852	COG1262S	S	-	hypothetical protein	Unknown	808974	229	+	C	T	Leu	Leu	synonymous
21469	Rv0755c	57116777	COG5651N	N	PPE12	PPE family protein	Extracellular	849486	555	-	G	C	Asn	Lys	nsSNP
21473	Rv0758	15607898	COG0642T	T	phoR	two component system response sensor kinase membrane associated PHOR	Cytoplasmic Membrane	852711	316	+	C	T	Pro	Ser	nsSNP
21486	Rv0771	15607911	COG0599S	S	-	4-carboxymuconolactone decarboxylase	Cytoplasmic Membrane	864468	329	+	A	G	Glu	Gly	nsSNP
21487	Rv0772	15607912	COG0151F	F	purD	phosphoribosylamine--glycine ligase	Cytoplasmic	865091	506	+	C	T	Ala	Val	nsSNP
21508	Rv0792c	15607932	COG2188K	K	-	GntR family transcriptional regulator	Cytoplasmic	886006	641	-	A	G	Val	Ala	nsSNP
21516	Rv0800	15607940	COG1362E	E	pepC	putative aminopeptidase 2	Cytoplasmic	893895	578	+	C	T	Ala	Val	nsSNP
21556	Rv0840c	15607980	COG0596R	R	pip	proline iminopeptidase	Cytoplasmic	936593	725	-	T	C	His	Arg	nsSNP
21559	Rv0843	15607983	COG1071C	C	-	dehydrogenase	Cytoplasmic	940240	853	+	A	G	Thr	Ala	nsSNP
21574	Rv0858c	15607998	COG0436E	E	-	aminotransferase	Cytoplasmic	954906	15	-	C	T	Arg	Arg	synonymous
21588	Rv0872c	57116793	-		PE_PGRS15	PE-PGRS family protein	Extracellular	969667	578	-	G	C	Ala	Gly	nsSNP
21629	Rv0913c	15608053	COG3670Q	Q	-	dioxygenase	Unknown	1017836	890	-	A	C	Phe	Cys	nsSNP
21654	Rv0938	15608078	COG3285L	L	-	ATP-dependent DNA ligase	Cytoplasmic	1048061	1926	+	G	A	Gln	Gln	synonymous
21673	Rv0958	15608098	COG1239H	H	-	magnesium chelatase	Cytoplasmic	1070344	462	+	C	A	Ile	Ile	synonymous
21696	Rv0980c	57116809	COG3391S	S	PE_PGRS18	PE-PGRS family protein	Extracellular	1096235	217	-	C	G	Glu	Gln	nsSNP
21704	Rv0988	15608128	COG5621R	R	-	hypothetical protein	Cytoplasmic Membrane	1105587	472	+	T	C	Trp	Arg	nsSNP
21722	Rv1006	15608146	-		-	hypothetical protein	Unknown	1125256	1543	+	C	A	Arg	Arg	synonymous
21744	Rv1028c	15608168	COG2205T	T	kdpD	sensor protein KDPD	Cytoplasmic Membrane	1151004	683	-	A	G	Leu	Pro	nsSNP
21784	Rv1067c	57116818	-		PE_PGRS19	PE-PGRS family protein	Cytoplasmic Membrane	1190017	408	-	G	A	Tyr	Tyr	synonymous
21784	Rv1067c	57116818	-		PE_PGRS19	PE-PGRS family protein	Cytoplasmic Membrane	1190093	332	-	A	C	Leu	Trp	nsSNP
21789	Rv1072	15608212	COG4760S	S	-	transmembrane protein	Cytoplasmic Membrane	1196737	459	+	G	A	Met	Ile	nsSNP
21816	Rv1097c	15608237	-		-	hypothetical protein	Unknown	1225462	683	-	T	C	Asp	Gly	nsSNP
21830	Rv1111c	57116830	-		-	hypothetical protein	Cytoplasmic Membrane	1237536	657	-	C	G	Pro	Pro	synonymous
21848	Rv1128c	15608268	-		-	hypothetical protein	Cytoplasmic	1251932	1041	-	C	T	Leu	Leu	synonymous
21866	Rv1145	15608285	COG2409R	R	mmpL13a	transmembrane transport protein MmpL13A	Cytoplasmic Membrane	1273045	623	+	C	T	Ala	Val	nsSNP
21878	Rv1158c	15608298	-		-	hypothetical protein	Cytoplasmic Membrane	1284748	115	-	G	C	Pro	Ala	nsSNP
21893	Rv1172c	57116839	-		PE12	PE family protein	Cytoplasmic Membrane	1302220	462	-	A	G	Ala	Ala	synonymous
21899	Rv1178	15608318	COG0436E	E	-	N-succinyldiaminopimelate aminotransferase	Unknown	1310312	949	+	A	G	Ser	Gly	nsSNP
21902	Rv1181	15608321	COG3321Q	Q	pks4	polyketide beta-ketoacyl synthase PKS4	Cytoplasmic Membrane	1318563	3330	+	C	T	Asn	Asn	synonymous
21911	Rv1190	15608330	COG0596R	R	-	hypothetical protein	Unknown	1333639	660	+	T	C	Tyr	Tyr	synonymous
21919	Rv1198	15608338	-		esxL	putative ESAT-6 like protein ESXL (ESAT-6 like protein 4)	Unknown	1341254	249	+	G	A	Ala	Ala	synonymous
21922	Rv1201c	15608341	COG2171E	E	-	transferase	Unknown	1344222	948	-	G	A	Ala	Ala	synonymous
21922	Rv1201c	15608341	COG2171E	E	-	transferase	Unknown	1344318	852	-	G	C	Ser	Arg	nsSNP
21953	Rv1232c	15608372	COG2239P	P	-	hypothetical protein	Cytoplasmic	1375446	723	-	C	T	Leu	Leu	synonymous
21967	Rv1246c	15608386	COG2026JD	JD	-	hypothetical protein	Cytoplasmic	1388827	152	-	T	A	Asn	Ile	nsSNP
21982	Rv1261c	15608401	-		-	hypothetical protein	Cytoplasmic Membrane	1409766	168	-	C	T	Thr	Thr	synonymous
21994	Rv1273c	15608413	COG1132V	V	-	drugs-transport transmembrane ATP-binding protein ABC transporter	Cytoplasmic Membrane	1422920	1131	-	T	C	Thr	Thr	synonymous
21999	Rv1278	15608418	COG3593L	L	-	hypothetical protein	Cytoplasmic	1428862	1449	+	G	T	Leu	Phe	nsSNP
21999	Rv1278	15608418	COG3593L	L	-	hypothetical protein	Cytoplasmic	1429038	1625	+	A	C	Gln	Pro	nsSNP
22009	Rv1288	15608428	COG0627R	R	-	hypothetical protein	Cytoplasmic Membrane	1441794	447	+	A	G	Val	Val	synonymous
22009	Rv1288	15608428	COG0627R	R	-	hypothetical protein	Cytoplasmic Membrane	1442141	794	+	C	G	Thr	Arg	nsSNP
22032	Rv1310	15608450	COG0055C	C	atpD	F0F1 ATP synthase subunit beta	Cytoplasmic Membrane	1466779	939	+	C	T	Ile	Ile	synonymous
24707	Rvnr01	57116681	-		rrs	ribosomal RNA 16S		1473246	1401	+	A	G	Ser	Ser	synonymous
22051	Rv1328	15608468	COG0058G	G	glgP	glycogen phosphorylase GlgP	Cytoplasmic	1494589	26	+	T	G	Val	Gly	nsSNP
22086	Rv1363c	15608503	-		-	hypothetical protein	Cytoplasmic Membrane	1534637	756	-	G	A	Tyr	Tyr	synonymous
22115	Rv1392	15608531	COG0192H	H	metK	S-adenosylmethionine synthetase	Cytoplasmic	1568018	1194	+	C	T	Asp	Asp	synonymous
22120	Rv1397c	15608535	COG1487R	R	-	hypothetical protein	Unknown	1574120	394	-	G	A	Arg	Trp	nsSNP
22152	Rv1429	15608567	COG2508TQ	TQ	-	hypothetical protein	Cytoplasmic	1605170	293	+	C	T	Ala	Val	nsSNP
22161	Rv1438	15608576	COG0149G	G	tpiA	triosephosphate isomerase	Cytoplasmic	1615932	369	+	G	A	Lys	Lys	synonymous
22170	Rv1447c	15608585	COG0364G	G	zwf2	glucose-6-phosphate 1-dehydrogenase	Cytoplasmic	1626857	106	-	C	T	Val	Ile	nsSNP
22173	Rv1450c	57116865	-		PE_PGRS27	PE-PGRS family protein	Extracellular	1630811	3817	-	T	C	Thr	Ala	nsSNP
22178	Rv1455	15608593	-		-	hypothetical protein	Cytoplasmic Membrane	1641305	626	+	T	C	Val	Ala	nsSNP
22182	Rv1459c	15608597	-		-	integral membrane protein	Cytoplasmic Membrane	1645173	966	-	C	A	Trp	Cys	nsSNP
22184	Rv1461	15608599	COG0719O	O	-	hypothetical protein	Cytoplasmic	1647444	456	+	C	T	His	His	synonymous
22184	Rv1461	15608599	COG0719O	O	-	hypothetical protein	Cytoplasmic	1649256	2268	+	C	T	Cys	Cys	synonymous
22204	Rv1480	15608618	COG1721R	R	-	hypothetical protein	Cytoplasmic	1670814	402	+	C	T	Gly	Gly	synonymous
22210	Rv1486c	57116874	-		-	hypothetical protein	Cytoplasmic	1676629	255	-	C	T	Leu	Leu	synonymous
22212	Rv1488	15608626	COG0330O	O	-	hypothetical protein	Cytoplasmic Membrane	1677603	207	+	G	A	Glu	Glu	synonymous
22215	Rv1490	15608628	-		-	hypothetical protein	Cytoplasmic Membrane	1679523	202	+	C	A	His	Asn	nsSNP
22246	Rv1518	15608656	COG0463M	M	-	hypothetical protein	Cytoplasmic	1710354	711	+	C	G	Thr	Thr	synonymous
22252	Rv1524	15608662	COG1819GC	GC	-	glycosyltransferase	Cytoplasmic	1719823	1098	+	A	G	Lys	Lys	synonymous
22254	Rv1526c	15608664	COG1819GC	GC	-	glycosyltransferase	Cytoplasmic	1721372	689	-	A	C	Met	Arg	nsSNP
22255	Rv1527c	15608665	COG3321Q	Q	pks5	polyketide synthase pks5	Unknown	1728022	388	-	C	G	Gly	Arg	nsSNP
22258	Rv1530	15608668	COG1063ER	ER	adh	alcohol dehydrogenase adh	Cytoplasmic	1732204	832	+	A	G	Thr	Ala	nsSNP
22272	Rv1544	15608682	COG0300R	R	-	ketoacyl reductase	Cytoplasmic	1746336	243	+	G	C	Leu	Phe	nsSNP
22274	Rv1546	15608684	-		-	hypothetical protein	Unknown	1747327	133	+	C	T	Leu	Leu	synonymous
22337	Rv1609	15608747	COG0147EH	EH	trpE	anthranilate synthase component I	Cytoplasmic	1808795	893	+	A	C	Asp	Ala	nsSNP
22346	Rv1618	15608756	COG1946I	I	tesB1	acyl-CoA thioesterase II TesB1	Unknown	1817856	242	+	A	C	Glu	Ala	nsSNP
22352	Rv1624c	15608762	COG3247S	S	-	hypothetical protein	Cytoplasmic Membrane	1826451	135	-	T	G	Pro	Pro	synonymous
22369	Rv1640c	15608778	COG1190J	J	lysS	lysyl-tRNA synthetase	Cytoplasmic	1849381	2655	-	G	A	Ile	Ile	synonymous
22379	Rv1650	15608788	COG0072J	J	pheT	phenylalanyl-tRNA synthetase subunit beta	Cytoplasmic	1860528	771	+	T	C	Cys	Cys	synonymous
22380	Rv1651c	57116897	-		PE_PGRS30	PE-PGRS family protein	Unknown	1862521	2862	-	C	T	Thr	Thr	synonymous
22382	Rv1653	15608791	COG1364E	E	argJ	bifunctional ornithine acetyltransferase/N-acetylglutamate synthase protein	Cytoplasmic	1867614	984	+	C	T	Ala	Ala	synonymous
22382	Rv1653	15608791	COG1364E	E	argJ	bifunctional ornithine acetyltransferase/N-acetylglutamate synthase protein	Cytoplasmic	1867838	1208	+	G	A	Ser	Asn	nsSNP
22387	Rv1658	15608796	COG0137E	E	argG	argininosuccinate synthase	Cytoplasmic	1872211	849	+	G	A	Ala	Ala	synonymous
22390	Rv1661	15608799	COG3321Q	Q	pks7	polyketide synthase pks7	Cytoplasmic Membrane	1880697	5394	+	G	A	Val	Val	synonymous
22390	Rv1661	15608799	COG3321Q	Q	pks7	polyketide synthase pks7	Cytoplasmic Membrane	1880896	5593	+	T	C	Ser	Pro	nsSNP
22391	Rv1662	15608800	COG3321Q	Q	pks8	polyketide synthase pks8	Cytoplasmic Membrane	1884706	3003	+	A	G	Leu	Leu	synonymous
22402	Rv1673c	15608811	COG1305E	E	-	hypothetical protein	Cytoplasmic	1899111	122	-	G	T	Pro	Gln	nsSNP
22405	Rv1676	15608814	COG0450O	O	-	hypothetical protein	Cytoplasmic	1901184	138	+	T	G	Thr	Thr	synonymous
22415	Rv1686c	15608824	COG0842V	V	-	integral membrane protein ABC transporter	Cytoplasmic Membrane	1911594	488	-	C	T	Arg	Gln	nsSNP
22420	Rv1691	15608829	-		-	hypothetical protein	Cytoplasmic	1916506	558	+	C	G	Ser	Ser	synonymous
22442	Rv1712	15608850	COG0283F	F	cmk	cytidylate kinase	Cytoplasmic	1939861	263	+	T	C	Val	Ala	nsSNP
22474	Rv1744c	15608882	-		-	hypothetical protein	Cytoplasmic Membrane	1971246	145	-	C	T	Val	Ile	nsSNP
22485	Rv1755c	15608893	COG3511M	M	plcD	phospholipase C 4 PLCD	Cytoplasmic Membrane	1987628	69	-	G	A	Tyr	Tyr	synonymous
22505	Rv1774	15608912	COG0277C	C	-	oxidoreductase	Cytoplasmic	2008217	386	+	T	G	Val	Gly	nsSNP
22530	Rv1800	57116915	COG5651N	N	PPE28	PPE family protein	Cytoplasmic Membrane	2040868	1416	+	G	A	Pro	Pro	synonymous
22541	Rv1811	15608948	COG1285S	S	mgtC	Mg2+ transport P-type ATPase C	Cytoplasmic Membrane	2053454	12	+	G	A	Leu	Leu	synonymous
22545	Rv1815	15608952	-		-	hypothetical protein	Unknown	2057591	64	+	C	T	Pro	Ser	nsSNP
22547	Rv1817	15608954	COG1053C	C	-	hypothetical protein	Cytoplasmic	2059831	237	+	T	G	Gly	Gly	synonymous
22549	Rv1819c	15608956	COG4178R	R	-	drugs-transport transmembrane ATP-binding protein ABC transporter	Cytoplasmic Membrane	2063685	1044	-	C	T	Leu	Leu	synonymous
22549	Rv1819c	15608956	COG4178R	R	-	drugs-transport transmembrane ATP-binding protein ABC transporter	Cytoplasmic Membrane	2063911	818	-	A	G	Ile	Thr	nsSNP
22551	Rv1821	15608958	COG0653U	U	secA2	preprotein translocase subunit SecA	Cytoplasmic	2066470	14	+	G	A	Gly	Asp	nsSNP
22574	Rv1844c	57116925	COG0362G	G	gnd1	6-phosphogluconate dehydrogenase	Cytoplasmic	2094861	328	-	C	T	Gly	Ser	nsSNP
22582	Rv1852	15608989	COG0378OK	OK	ureG	urease accessory protein ureG	Unknown	2100906	567	+	C	T	Asp	Asp	synonymous
22603	Rv1873	15609010	COG5579S	S	-	hypothetical protein	Unknown	2123182	9	+	A	C	Ser	Ser	synonymous
22632	Rv1901	15609038	COG1058R	R	cinA	competence damage-inducible protein A	Cytoplasmic	2147906	245	+	C	T	Thr	Ile	nsSNP
22635	Rv1904	15609041	COG1366T	T	-	hypothetical protein	Unknown	2151148	195	+	C	G	Ile	Met	nsSNP
22639	Rv1908c	15609045	COG0376P	P	katG	catalase-peroxidase-peroxynitritase T KATG	Cytoplasmic	2155168	944	-	C	G	Ser	Thr	nsSNP
22649	Rv1918c	57116929	COG5651N	N	PPE35	PPE family protein	Cytoplasmic Membrane	2169879	734	-	A	C	Phe	Cys	nsSNP
22652	Rv1921c	15609058	COG0560E	E	lppF	lipoprotein LppF	Unknown	2173033	763	-	A	G	Trp	Arg	nsSNP
22659	Rv1928c	15609065	COG1028IQR	IQR	-	short chain dehydrogenase	Cytoplasmic	2181026	192	-	G	C	Pro	Pro	synonymous
22665	Rv1934c	15609071	COG1960I	I	fadE17	acyl-CoA dehydrogenase FADE17	Cytoplasmic	2185342	847	-	C	T	Asp	Asn	nsSNP
22666	Rv1935c	15609072	COG1024I	I	echA13	enoyl-CoA hydratase	Cytoplasmic	2186785	375	-	C	T	Gln	Gln	synonymous
22669	Rv1938	15609075	COG0596R	R	ephB	epoxide hydrolase EphB	Cytoplasmic	2191148	122	+	A	C	Tyr	Ser	nsSNP
22678	Rv1947	15609084	-		-	hypothetical protein	Cytoplasmic Membrane	2198326	303	+	G	A	Val	Val	synonymous
22697	Rv1966	57116931	COG1463Q	Q	mce3A	MCE-family protein MCE3A	Unknown	2209807	481	+	C	T	Pro	Ser	nsSNP
22698	Rv1967	15609104	COG1463Q	Q	mce3B	MCE-family protein MCE3B	Unknown	2211600	1000	+	C	G	Gln	Glu	nsSNP
22702	Rv1971	15609108	COG1463Q	Q	mce3F	MCE-family protein MCE3F	Cytoplasmic Membrane	2216035	779	+	A	G	Glu	Gly	nsSNP
22724	Rv1992c	15609129	COG2217P	P	ctpG	metal cation transporter P-type ATPase G CtpG	Cytoplasmic Membrane	2237059	248	-	G	T	Thr	Asn	nsSNP
22731	Rv1999c	15609136	COG0531E	E	-	integral membrane protein	Cytoplasmic Membrane	2244298	841	-	C	T	Ala	Thr	nsSNP
22737	Rv2005c	15609142	COG0589T	T	-	hypothetical protein	Cytoplasmic	2251179	705	-	C	T	Pro	Pro	synonymous
22747	Rv2015c	15609152	-		-	hypothetical protein	Cytoplasmic	2262026	1047	-	T	G	Ala	Ala	synonymous
22762	Rv2030c	15609167	COG2312R	R	-	hypothetical protein	Cytoplasmic	2277272	1215	-	A	G	Tyr	Tyr	synonymous
22780	Rv2048c	15609185	COG3321Q	Q	pks12	polyketide synthase pks12	Unknown	2300664	6323	-	G	A	Pro	Leu	nsSNP
22792	Rv2060	15609197	COG1108P	P	-	integral membrane protein	Cytoplasmic Membrane	2316510	232	+	G	A	Val	Ile	nsSNP
22791	Rv2059	15609196	COG0803P	P	-	hypothetical protein	Unknown	2316510	1337	+	G	A	Gly	Asp	nsSNP
22815	Rv2082	15609219	-		-	hypothetical protein	Cellwall	2339907	1199	+	C	G	Pro	Arg	nsSNP
22816	Rv2083	15609220	-		-	hypothetical protein	Unknown	2341242	372	+	G	A	Ala	Ala	synonymous
22822	Rv2089c	15609226	COG0006E	E	pepE	dipeptidase PepE	Cytoplasmic	2346278	1047	-	C	A	Glu	Asp	nsSNP
22825	Rv2092c	15609229	COG4581L	L	helY	ATP-dependent DNA helicase HelY	Cytoplasmic	2350315	1740	-	C	T	Pro	Pro	synonymous
22831	Rv2100	15609237	-		-	hypothetical protein	Cytoplasmic	2359051	663	+	T	C	Asp	Asp	synonymous
22831	Rv2100	15609237	-		-	hypothetical protein	Cytoplasmic	2359072	684	+	G	A	Ala	Ala	synonymous
22831	Rv2100	15609237	-		-	hypothetical protein	Cytoplasmic	2359075	687	+	G	A	Leu	Leu	synonymous
22832	Rv2101	15609238	COG0553KL	KL	helZ	helicase HelZ	Cytoplasmic	2361492	1253	+	T	G	Leu	Arg	nsSNP
22849	Rv2118c	15609255	COG2519J	J	-	RNA methyltransferase	Cytoplasmic	2378183	130	-	C	T	Ala	Thr	nsSNP
22865	Rv2134c	15609271	-		-	hypothetical protein	Cytoplasmic	2394922	316	-	C	T	Val	Met	nsSNP
22865	Rv2134c	15609271	-		-	hypothetical protein	Cytoplasmic	2395019	219	-	G	A	Pro	Pro	synonymous
22867	Rv2136c	15609273	COG1968V	V	uppP	undecaprenyl pyrophosphate phosphatase	Cytoplasmic Membrane	2396770	69	-	G	C	Ser	Ser	synonymous
22872	Rv2141c	57116951	COG0624E	E	-	hypothetical protein	Unknown	2401698	25	-	T	G	Ser	Arg	nsSNP
22883	Rv2152c	15609289	COG0773M	M	murC	UDP-N-acetylmuramate--L-alanine ligase	Cytoplasmic	2411730	393	-	G	C	Ser	Ser	synonymous
22888	Rv2157c	15609294	COG0770M	M	murF	UDP-N-acetylmuramoylalanyl-D-glutamyl-2,6-diaminopimelate- D-alanyl-D-alanyl ligase MurF	Cytoplasmic	2418394	611	-	G	C	Pro	Arg	nsSNP
22911	Rv2179c	15609316	-		-	hypothetical protein	Cytoplasmic	2441970	348	-	G	A	Phe	Phe	synonymous
22916	Rv2184c	15609321	COG0003P	P	-	hypothetical protein	Cytoplasmic	2446461	486	-	G	A	Arg	Arg	synonymous
22944	Rv2212	15609349	COG2114T	T	-	hypothetical protein	Cytoplasmic	2478266	1077	+	A	C	Glu	Asp	nsSNP
22946	Rv2214c	15609351	COG0300R	R	ephD	short chain dehydrogenase	Cytoplasmic	2480676	1026	-	G	A	Leu	Leu	synonymous
22966	Rv2234	15609371	COG0394T	T	ptpA	phosphotyrosine protein phosphatase PTPA (protein-tyrosine-phosphatase) (PTPase) (LMW phosphatase)	Cytoplasmic	2507412	267	+	G	A	Leu	Leu	synonymous
22980	Rv2248	15609385	-		-	hypothetical protein	Cytoplasmic	2522550	191	+	T	C	Val	Ala	nsSNP
22984	Rv2251	15609388	COG0277C	C	-	flavoprotein	Cytoplasmic	2525776	212	+	C	T	Ala	Val	nsSNP
22983	Rv2250A	57116960	-		-	flavoprotein	Unknown	2525776	375	+	C	T	Cys	Cys	synonymous
22999	Rv2266	15609403	COG2124Q	Q	cyp124	cytochrome P450 124 CYP124	Cytoplasmic Membrane	2540441	338	+	T	C	Leu	Pro	nsSNP
23007	Rv2274c	15609411	-		-	hypothetical protein	Unknown	2546708	98	-	A	G	Ile	Thr	nsSNP
23019	Rv2286c	15609423	COG3917Q	Q	-	hypothetical protein	Cytoplasmic	2559151	419	-	C	T	Gly	Asp	nsSNP
23053	Rv2315c	15609452	COG0312R	R	-	hypothetical protein	Unknown	2587327	1478	-	C	G	Gly	Ala	nsSNP
23059	Rv2321c	15609458	COG4992E	E	rocD2	ornithine aminotransferase	Cytoplasmic	2594472	228	-	G	A	Pro	Pro	synonymous
23084	Rv2345	15609482	COG1512R	R	-	transmembrane protein	Cytoplasmic Membrane	2625052	1232	+	G	A	Arg	Gln	nsSNP
23090	Rv2351c	15609488	COG3511M	M	plcA	membrane-associated phospholipase C	Cytoplasmic Membrane	2631226	850	-	C	A	Asp	Tyr	nsSNP
23119	Rv2380c	15609517	COG1020Q	Q	mbtE	peptide synthetase MBTE (peptide synthase)	Cytoplasmic	2665161	1955	-	G	A	Thr	Ile	nsSNP
23175	Rv2435c	15609572	COG2114T	T	-	cyclase	Cytoplasmic	2732121	629	-	G	T	Thr	Asn	nsSNP
23189	Rv2448c	15609585	COG0525J	J	valS	valyl-tRNA synthetase	Cytoplasmic	2748087	2139	-	G	A	Ser	Ser	synonymous
23208	Rv2467	57116994	COG0308E	E	pepN	aminopeptidase N	Cytoplasmic	2769544	559	+	A	G	Thr	Ala	nsSNP
23226	Rv2485c	15609622	COG0657I	I	lipQ	carboxylesterase LipQ	Cytoplasmic	2793706	283	-	G	A	Leu	Phe	nsSNP
23244	Rv2503c	15609640	COG2057I	I	scoB	succinyl-CoA:3-ketoacid-coenzyme A transferase subunit beta ScoB	Cytoplasmic	2818499	629	-	A	T	Leu	His	nsSNP
23248	Rv2507	15609644	-		-	proline rich membrane protein	Cytoplasmic Membrane	2822478	41	+	T	A	Leu	Gln	nsSNP
23263	Rv2522c	15609659	COG0624E	E	-	hypothetical protein	Cytoplasmic	2838564	978	-	C	G	Pro	Pro	synonymous
23265	Rv2524c	15609661	COG4982I	I	fas	fatty acid synthase	Cytoplasmic Membrane	2840243	9090	-	C	T	Pro	Pro	synonymous
23303	Rv2561	15609698	-		-	hypothetical protein	Unknown	2881496	88	+	G	A	Ala	Thr	nsSNP
23305	Rv2563	15609700	-		-	glutamine-transport transmembrane protein ABC transporter	Cytoplasmic Membrane	2882343	54	+	C	A	Ile	Ile	synonymous
23308	Rv2566	15609703	COG4196S	S	-	hypothetical protein	Cytoplasmic	2888470	2098	+	A	G	Thr	Ala	nsSNP
23309	Rv2567	15609704	COG2308S	S	-	hypothetical protein	Cytoplasmic Membrane	2892155	2361	+	G	C	Leu	Leu	synonymous
23317	Rv2575	15609712	COG2321R	R	-	hypothetical protein	Unknown	2900211	873	+	C	A	Asp	Glu	nsSNP
23331	Rv2589	15609726	COG0160E	E	gabT	4-aminobutyrate aminotransferase	Cytoplasmic	2917328	969	+	G	A	Thr	Thr	synonymous
23332	Rv2590	15609727	COG3320Q	Q	fadD9	fatty-acid-CoA ligase	Cytoplasmic	2918654	784	+	G	A	Val	Met	nsSNP
23357	Rv2614c	15609751	COG0441J	J	thrS	threonyl-tRNA synthetase	Cytoplasmic	2942377	891	-	G	A	Gly	Gly	synonymous
23367	Rv2623	15609760	COG0589T	T	TB31.7	hypothetical protein	Cytoplasmic	2949884	292	+	G	A	Ala	Thr	nsSNP
23369	Rv2625c	15609762	COG1994R	R	-	hypothetical protein	Cytoplasmic Membrane	2951784	720	-	C	G	Gln	His	nsSNP
23371	Rv2627c	15609764	-		-	hypothetical protein	Cytoplasmic	2954571	178	-	A	C	Leu	Val	nsSNP
23378	Rv2634c	57117010	-		PE_PGRS46	PE-PGRS family protein	Unknown	2961445	997	-	C	T	Ala	Thr	nsSNP
23416	Rv2672	15609809	COG0596R	R	-	secreted protease	Unknown	2988815	1134	+	C	G	Asn	Lys	nsSNP
23422	Rv2678c	15609815	COG0407H	H	hemE	uroporphyrinogen decarboxylase	Cytoplasmic	2994191	872	-	G	A	Ala	Val	nsSNP
23453	Rv2709	15609846	-		-	transmembrane protein	Cytoplasmic Membrane	3021962	124	+	G	A	Glu	Lys	nsSNP
23469	Rv2725c	15609862	COG2262R	R	hflX	GTP-binding protein HflX	Cytoplasmic	3037958	957	-	T	G	Pro	Pro	synonymous
23479	Rv2735c	15609872	-		-	hypothetical protein	Unknown	3047617	936	-	C	T	Pro	Pro	synonymous
23478	Rv2734	15609871	COG4422S	S	-	hypothetical protein	Cytoplasmic	3047617	797	+	C	T	Thr	Met	nsSNP
23488	Rv2743c	15609880	-		-	hypothetical protein	Cytoplasmic Membrane	3056663	570	-	G	A	Cys	Cys	synonymous
23524	Rv2779c	57117025	COG1522K	K	-	LRP/AsnC family transcriptional regulator	Cytoplasmic	3086742	13	-	A	C	Phe	Val	nsSNP
23539	Rv2794c	15609931	COG2977Q	Q	-	hypothetical protein	Cytoplasmic	3103461	480	-	G	A	Tyr	Tyr	synonymous
23540	Rv2795c	15609932	COG1409R	R	-	hypothetical protein	Cytoplasmic	3104336	576	-	T	C	Glu	Glu	synonymous
23562	Rv2817c	15609954	COG1518L	L	-	hypothetical protein	Cytoplasmic	3124014	970	-	A	C	Ser	Ala	nsSNP
23569	Rv2824c	15609961	COG5551S	S	-	hypothetical protein	Cytoplasmic Membrane	3132112	603	-	C	T	Trp	Ter	nsSNP
23609	Rv2864c	15610001	COG0768M	M	-	penicillin-binding lipoprotein	Cytoplasmic Membrane	3175964	1302	-	C	G	Leu	Leu	synonymous
23619	Rv2874	15610011	COG0785O	O	dipZ	integral membrane C-type cytochrome biogenesis protein DipZ	Cytoplasmic Membrane	3186664	1818	+	A	C	Ala	Ala	synonymous
23632	Rv2887	15610024	COG1846K	K	-	transcriptional regulatory protein	Cytoplasmic	3196785	355	+	G	A	Ala	Thr	nsSNP
23634	Rv2889c	15610026	COG0264J	J	tsf	elongation factor Ts	Cytoplasmic	3198496	612	-	G	A	Ile	Ile	synonymous
23650	Rv2905	15610042	-		lppW	alanine rich lipoprotein LppW	Cytoplasmic Membrane	3214966	339	+	T	C	Ile	Ile	synonymous
23655	Rv2910c	15610047	-		-	hypothetical protein	Cytoplasmic	3218122	149	-	A	C	Ile	Ser	nsSNP
23666	Rv2921c	15610058	COG0552U	U	ftsY	cell division protein FtsY	Cytoplasmic Membrane	3233940	200	-	G	C	Ala	Gly	nsSNP
23679	Rv2933	15610070	COG3321Q	Q	ppsC	phenolpthiocerol synthesis type-I polyketide synthase PPSC	Cytoplasmic Membrane	3257233	1549	+	G	A	Asp	Asn	nsSNP
23679	Rv2933	15610070	COG3321Q	Q	ppsC	phenolpthiocerol synthesis type-I polyketide synthase PPSC	Cytoplasmic Membrane	3257531	1847	+	G	A	Arg	His	nsSNP
23692	Rv2945c	15610082	-		lppX	lipoprotein LppX	Cytoplasmic Membrane	3290870	456	-	G	C	Ser	Ser	synonymous
23703	Rv2956	15610093	-		-	hypothetical protein	Cytoplasmic	3309275	608	+	C	G	Pro	Arg	nsSNP
23709	Rv2962c	15610099	COG1819GC	GC	-	glycosyl transferase	Cytoplasmic Membrane	3314399	724	-	G	T	Leu	Met	nsSNP
23773	Rv3023c	15610160	COG3328L	L	-	transposase	Cytoplasmic	3381641	982	-	G	T	Gln	Lys	nsSNP
23781	Rv3031	15610168	COG1543S	S	-	hypothetical protein	Cytoplasmic	3391074	1153	+	G	C	Val	Leu	nsSNP
23794	Rv3044	15610181	COG0614P	P	fecB	FEIII-dicitrate-binding periplasmic lipoprotein	Unknown	3406045	910	+	G	A	Ala	Thr	nsSNP
23810	Rv3060c	15610197	COG2186K	K	-	GntR family transcriptional regulator	Cytoplasmic Membrane	3422104	1110	-	G	A	Val	Val	synonymous
23810	Rv3060c	15610197	COG2186K	K	-	GntR family transcriptional regulator	Cytoplasmic Membrane	3422687	527	-	G	A	Thr	Ile	nsSNP
23830	Rv3080c	15610217	COG2909K	K	pknK	serine/threonine-protein kinase transcriptional regulatory protein	Cytoplasmic Membrane	3442970	3019	-	C	T	Ala	Thr	nsSNP
23832	Rv3082c	15610219	COG2207K	K	virS	virulence-regulating transcriptional regulator VirS	Cytoplasmic	3447800	627	-	G	T	Asp	Glu	nsSNP
23847	Rv3097c	57117054	COG0657I	I	lipY	triacylglycerol lipase	Cytoplasmic Membrane	3466646	446	-	C	T	Gly	Glu	nsSNP
23850	Rv3100c	15610237	COG0691O	O	smpB	SsrA-binding protein	Cytoplasmic	3469694	90	-	G	T	Ala	Ala	synonymous
23852	Rv3102c	15610239	COG2884D	D	ftsE	putative cell division ATP-binding protein FTSE (septation component-transport ATP-binding protein ABC transporter)	Cytoplasmic Membrane	3471151	219	-	G	A	Arg	Arg	synonymous
23856	Rv3106	15610243	COG0493ER	ER	fprA	NADPH:adrenodoxin oxidoreductase FPRA (NADPH-ferredoxin reductase)	Cytoplasmic	3475324	1318	+	C	G	Pro	Ala	nsSNP
23881	Rv3132c	15610268	COG4585T	T	devS	two component sensor histidine kinase DEVS	Cytoplasmic Membrane	3498364	902	-	T	C	Asn	Ser	nsSNP
23920	Rv3171c	15610307	COG0596R	R	hpx	non-Heme haloperoxidase Hpx	Cytoplasmic	3540311	435	-	C	A	Leu	Phe	nsSNP
23921	Rv3172c	15610308	-		-	hypothetical protein	Unknown	3541237	128	-	T	A	Lys	Ile	nsSNP
23941	Rv3192	15610328	COG2141C	C	-	hypothetical protein	Unknown	3559759	197	+	G	A	Trp	Ter	nsSNP
23944	Rv3195	15610331	COG5282S	S	-	hypothetical protein	Cytoplasmic	3564737	374	+	G	C	Gly	Ala	nsSNP
23953	Rv3201c	15610337	COG0210L	L	-	ATP-dependent DNA helicase	Cytoplasmic	3574504	2533	-	G	A	Arg	Trp	nsSNP
23954	Rv3202c	15610338	COG2887L	L	-	ATP-dependent DNA helicase	Cytoplasmic	3577864	2337	-	A	C	Gly	Gly	synonymous
23960	Rv3208	15610344	COG1309K	K	-	TetR family transcriptional regulator	Cytoplasmic	3585577	574	+	T	C	Cys	Arg	nsSNP
23965	Rv3212	15610348	-		-	hypothetical protein	Unknown	3589537	144	+	C	T	Pro	Pro	synonymous
24022	Rv3266c	15610402	COG1091M	M	rmlD	dTDP-6-deoxy-L-lyxo-4-hexulose reductase RmlD	Cytoplasmic	3646964	846	-	C	G	Leu	Leu	synonymous
24041	Rv3285	15610421	COG4770I	I	accA3	bifunctional acetyl-/propionyl-coenzyme A carboxylase subunit alpha	Cytoplasmic	3666905	549	+	C	T	Thr	Thr	synonymous
24055	Rv3299c	15610435	COG3119P	P	atsB	arylsulfatase AtsB	Cytoplasmic	3685101	863	-	C	G	Gly	Ala	nsSNP
24076	Rv3319	15610455	COG0479C	C	sdhB	succinate dehydrogenase iron-sulfur subunit	Cytoplasmic Membrane	3707164	393	+	G	T	Leu	Leu	synonymous
24084	Rv3327	15610463	COG2128S	S	-	transposase	Cytoplasmic	3711910	162	+	G	A	Trp	Ter	nsSNP
24084	Rv3327	15610463	COG2128S	S	-	transposase	Cytoplasmic	3712145	397	+	G	A	Asp	Asn	nsSNP
24084	Rv3327	15610463	COG2128S	S	-	transposase	Cytoplasmic	3712372	624	+	A	G	Leu	Leu	synonymous
24084	Rv3327	15610463	COG2128S	S	-	transposase	Cytoplasmic	3712522	774	+	A	C	Ala	Ala	synonymous
24100	Rv3343c	57117092	COG5651N	N	PPE54	PPE family protein	Cytoplasmic Membrane	3731461	5475	-	C	G	Thr	Thr	synonymous
24100	Rv3343c	57117092	COG5651N	N	PPE54	PPE family protein	Cytoplasmic Membrane	3732089	4847	-	C	T	Gly	Asp	nsSNP
24100	Rv3343c	57117092	COG5651N	N	PPE54	PPE family protein	Cytoplasmic Membrane	3732113	4823	-	C	G	Arg	Thr	nsSNP
24100	Rv3343c	57117092	COG5651N	N	PPE54	PPE family protein	Cytoplasmic Membrane	3732114	4822	-	G	T	Arg	Thr	nsSNP
24100	Rv3343c	57117092	COG5651N	N	PPE54	PPE family protein	Cytoplasmic Membrane	3736276	660	-	G	A	Gly	Gly	synonymous
24100	Rv3343c	57117092	COG5651N	N	PPE54	PPE family protein	Cytoplasmic Membrane	3736282	654	-	G	A	Asn	Asn	synonymous
24100	Rv3343c	57117092	COG5651N	N	PPE54	PPE family protein	Cytoplasmic Membrane	3736286	650	-	T	A	Tyr	Phe	nsSNP
24100	Rv3343c	57117092	COG5651N	N	PPE54	PPE family protein	Cytoplasmic Membrane	3736288	648	-	G	C	Ser	Gly	nsSNP
24100	Rv3343c	57117092	COG5651N	N	PPE54	PPE family protein	Cytoplasmic Membrane	3736290	646	-	T	C	Ser	Gly	nsSNP
24100	Rv3343c	57117092	COG5651N	N	PPE54	PPE family protein	Cytoplasmic Membrane	3736291	645	-	C	A	Gly	Gly	synonymous
24100	Rv3343c	57117092	COG5651N	N	PPE54	PPE family protein	Cytoplasmic Membrane	3736303	633	-	G	C	Ala	Ala	synonymous
24100	Rv3343c	57117092	COG5651N	N	PPE54	PPE family protein	Cytoplasmic Membrane	3736306	630	-	C	A	Gly	Gly	synonymous
24104	Rv3347c	57117095	COG5651N	N	PPE55	PPE family protein	Cytoplasmic Membrane	3750969	2216	-	C	T	Gly	Glu	nsSNP
24154	Rv3396c	15610532	COG0519F	F	guaA	GMP synthase	Cytoplasmic	3813712	367	-	G	A	Leu	Phe	nsSNP
24186	Rv3428c	15610564	COG4584L	L	-	transposase	Cytoplasmic Membrane	3844992	979	-	T	A	Ser	Cys	nsSNP
24187	Rv3429	57117107	COG5651N	N	PPE59	PPE family protein	Unknown	3847169	5	+	A	T	His	Phe	nsSNP
24187	Rv3429	57117107	COG5651N	N	PPE59	PPE family protein	Unknown	3847174	10	+	A	T	Met	Leu	nsSNP
24187	Rv3429	57117107	COG5651N	N	PPE59	PPE family protein	Unknown	3847178	14	+	T	C	Ile	Thr	nsSNP
24187	Rv3429	57117107	COG5651N	N	PPE59	PPE family protein	Unknown	3847186	22	+	G	C	Glu	His	nsSNP
24187	Rv3429	57117107	COG5651N	N	PPE59	PPE family protein	Unknown	3847188	24	+	G	C	Glu	His	nsSNP
24187	Rv3429	57117107	COG5651N	N	PPE59	PPE family protein	Unknown	3847189	25	+	T	C	Tyr	Gln	nsSNP
24187	Rv3429	57117107	COG5651N	N	PPE59	PPE family protein	Unknown	3847191	27	+	T	G	Tyr	Gln	nsSNP
24187	Rv3429	57117107	COG5651N	N	PPE59	PPE family protein	Unknown	3847198	34	+	A	T	Asn	Tyr	nsSNP
24187	Rv3429	57117107	COG5651N	N	PPE59	PPE family protein	Unknown	3847201	37	+	A	C	Ile	Gln	nsSNP
24187	Rv3429	57117107	COG5651N	N	PPE59	PPE family protein	Unknown	3847202	38	+	T	A	Ile	Gln	nsSNP
24187	Rv3429	57117107	COG5651N	N	PPE59	PPE family protein	Unknown	3847206	42	+	A	G	Ile	Met	nsSNP
24187	Rv3429	57117107	COG5651N	N	PPE59	PPE family protein	Unknown	3847211	47	+	A	C	Glu	Ala	nsSNP
24187	Rv3429	57117107	COG5651N	N	PPE59	PPE family protein	Unknown	3847212	48	+	A	C	Glu	Ala	nsSNP
24192	Rv3434c	15610570	-		-	transmembrane protein	Cytoplasmic Membrane	3853639	290	-	G	A	Ala	Val	nsSNP
24205	Rv3447c	15610583	COG1674D	D	-	hypothetical protein	Cytoplasmic Membrane	3867404	835	-	C	A	Glu	Ter	nsSNP
24206	Rv3448	15610584	-		-	integral membrane protein	Cytoplasmic Membrane	3868379	28	+	C	T	Arg	Trp	nsSNP
24206	Rv3448	15610584	-		-	integral membrane protein	Cytoplasmic Membrane	3869352	1001	+	C	T	Ala	Val	nsSNP
24208	Rv3450c	15610586	-		-	hypothetical protein	Cytoplasmic Membrane	3871880	617	-	G	A	Pro	Leu	nsSNP
24212	Rv3454	15610590	COG1457F	F	-	integral membrane protein	Cytoplasmic Membrane	3875017	196	+	G	T	Gly	Ter	nsSNP
24212	Rv3454	15610590	COG1457F	F	-	integral membrane protein	Cytoplasmic Membrane	3875230	409	+	A	G	Thr	Ala	nsSNP
24240	Rv3482c	15610618	-		-	hypothetical protein	Unknown	3901772	335	-	G	T	Thr	Asn	nsSNP
24256	Rv3498c	15610634	COG1463Q	Q	mce4B	MCE-family protein MCE4B	Unknown	3917305	694	-	C	A	Val	Phe	nsSNP
24291	Rv3533c	57117121	COG5651N	N	PPE62	PPE family protein	Cytoplasmic Membrane	3971125	1329	-	C	T	Thr	Thr	synonymous
24297	Rv3539	57117123	COG5651N	N	PPE63	PPE family protein	Cytoplasmic Membrane	3978697	639	+	G	A	Ala	Ala	synonymous
24317	Rv3559c	15610695	COG1028IQR	IQR	-	short chain dehydrogenase	Cytoplasmic	3999707	729	-	G	A	Ala	Ala	synonymous
24324	Rv3566c	57117125	COG2162Q	Q	nat	arylamine n-acetyltransferase nat (arylamine acetylase)	Cytoplasmic	4007595	588	-	G	A	Ala	Ala	synonymous
24333	Rv3574	15610710	COG1309K	K	-	transcriptional regulatory protein TetR-family	Cytoplasmic Membrane	4016738	255	+	C	G	Ala	Ala	synonymous
24368	Rv3609c	15610745	COG0302H	H	folE	GTP cyclohydrolase I	Unknown	4050052	534	-	C	T	Thr	Thr	synonymous
24377	Rv3618	15610754	COG2141C	C	-	monooxygenase	Cytoplasmic	4059257	560	+	G	A	Gly	Asp	nsSNP
24394	Rv3635	15610771	-		-	transmembrane protein	Cytoplasmic Membrane	4073918	285	+	G	A	Leu	Leu	synonymous
24399	Rv3640c	15610776	COG3328L	L	-	transposase	Cytoplasmic	4079417	333	-	G	A	His	His	synonymous
24441	Rv3681c	57117144	-		whiB4	transcriptional regulatory protein WHIB-like WHIB4	Unknown	4121213	342	-	G	C	Thr	Thr	synonymous
24444	Rv3684	15610820	COG0031E	E	-	lyase	Unknown	4126282	844	+	C	T	Leu	Phe	nsSNP
24446	Rv3686c	15610822	-		-	hypothetical protein	Cytoplasmic Membrane	4128906	178	-	C	T	Ala	Thr	nsSNP
24448	Rv3688c	15610824	COG1610S	S	-	hypothetical protein	Cytoplasmic	4129917	441	-	C	A	Ser	Ser	synonymous
24458	Rv3698	15610834	-		-	hypothetical protein	Cytoplasmic	4141127	635	+	A	G	His	Arg	nsSNP
24475	Rv3714c	15610850	-		-	hypothetical protein	Cytoplasmic Membrane	4159589	233	-	G	A	Ala	Val	nsSNP
24484	Rv3723	15610859	-		-	transmembrane protein	Cytoplasmic Membrane	4168771	236	+	C	T	Ser	Leu	nsSNP
24489	Rv3727	15610863	COG3349S	S	-	oxidoreductase	Cytoplasmic	4174532	1578	+	G	A	Ala	Ala	synonymous
24501	Rv3739c	57117151	COG5651N	N	PPE67	PPE family protein	Cytoplasmic Membrane	4190459	59	-	G	A	Ala	Val	nsSNP
24515	Rv3753c	15610889	-		-	hypothetical protein	Cytoplasmic	4199739	483	-	G	T	Ile	Ile	synonymous
24528	Rv3766	15610902	-		-	hypothetical protein	Unknown	4212976	684	+	G	A	Ala	Ala	synonymous
24547	Rv3783	15610919	COG1682GM	GM	rfbD	O-antigen/lipopolysaccharide transport integral membrane protein ABC transporter RfbD	Cytoplasmic Membrane	4230033	776	+	T	C	Val	Ala	nsSNP
24559	Rv3795	15610931	-		embB	integral membrane indolylacetylinositol arabinosyltransferase EMBB (arabinosylindolylacetylinositol synthase)	Cytoplasmic Membrane	4247431	918	+	G	A	Met	Ile	nsSNP
24559	Rv3795	15610931	-		embB	integral membrane indolylacetylinositol arabinosyltransferase EMBB (arabinosylindolylacetylinositol synthase)	Cytoplasmic Membrane	4249007	2494	+	C	T	Pro	Ser	nsSNP
24559	Rv3795	15610931	-		embB	integral membrane indolylacetylinositol arabinosyltransferase EMBB (arabinosylindolylacetylinositol synthase)	Cytoplasmic Membrane	4249594	3081	+	G	A	Thr	Thr	synonymous
24564	Rv3800c	15610936	COG3321Q	Q	pks13	polyketide synthase PKS13	Cytoplasmic Membrane	4260155	992	-	G	A	Ala	Val	nsSNP
24568	Rv3804c	15610940	COG0627R	R	fbpA	secreted antigen 85-A FBPA (Mycolyl transferase 85A) (fibronectin-binding protein A) (antigen 85 complex A)	Extracellular	4266346	313	-	C	T	Asp	Asn	nsSNP
24579	Rv3815c	15610951	COG0204I	I	-	acyltransferase	Cytoplasmic	4280072	717	-	C	A	Ala	Ala	synonymous
24582	Rv3818	15610954	COG2220R	R	-	hypothetical protein	Cytoplasmic	4282931	483	+	G	C	Val	Val	synonymous
24587	Rv3823c	15610959	COG2409R	R	mmpL8	integral membrane transport protein	Cytoplasmic Membrane	4291449	81	-	A	C	Gly	Gly	synonymous
24593	Rv3829c	15610965	COG1233Q	Q	-	dehydrogenase	Cytoplasmic	4304293	716	-	G	A	Thr	Ile	nsSNP
24599	Rv3835	15610971	-		-	hypothetical protein	Cytoplasmic Membrane	4309617	571	+	G	T	Ala	Ser	nsSNP
24600	Rv3836	15610972	COG3824S	S	-	hypothetical protein	Cytoplasmic	4310449	49	+	G	A	Ala	Thr	nsSNP
24600	Rv3836	15610972	COG3824S	S	-	hypothetical protein	Cytoplasmic	4310555	155	+	G	C	Gly	Ala	nsSNP
24614	Rv3850	15610986	-		-	hypothetical protein	Cytoplasmic	4324042	28	+	C	T	Arg	Cys	nsSNP
24623	Rv3859c	15610995	COG0069E	E	gltB	ferredoxin-dependent glutamate synthase [NADPH] large subunit	Cytoplasmic Membrane	4333703	2379	-	C	T	Leu	Leu	synonymous
24641	Rv3877	15611013	-		-	transmembrane protein	Cytoplasmic Membrane	4355141	135	+	A	C	Glu	Asp	nsSNP
24646	Rv3882c	15611018	-		-	hypothetical protein	Cytoplasmic	4362735	686	-	T	C	Asp	Gly	nsSNP
24658	Rv3894c	15611030	COG1674D	D	-	hypothetical protein	Cytoplasmic Membrane	4376445	4008	-	G	A	Pro	Pro	synonymous
24667	Rv3903c	15611039	-		-	hypothetical protein	Unknown	4388730	1703	-	T	C	Gln	Arg	nsSNP
24667	Rv3903c	15611039	-		-	hypothetical protein	Unknown	4390391	42	-	C	G	Ala	Ala	synonymous
24673	Rv3909	15611045	-		-	hypothetical protein	Cytoplasmic Membrane	4394744	553	+	G	C	Val	Leu	nsSNP
24681	Rv3917c	57117170	COG1475K	K	parB	chromosome partitioning protein ParB	Cytoplasmic	4406116	376	-	C	A	Ala	Ser	nsSNP
