# Supplementary material for: Comparative Genomic Analysis of Mycobacterium tuberculosis Drug Resistant Strains from Russia
Source: PLoS One. 2013 Feb 20;8(2):e56577. doi: 10.1371/journal.pone.0056577 (PMC3577857; doi:10.1371/journal.pone.0056577)
Supplement: Table S3 — Individual SNPs identified for CTRI-4(XDR). (XLSX) [file pone.0056577.s003.xlsx]

## Sheet: Лист1
Table S3. Individual SNPs identified for CTRI-4(XDR).
Protein id	Locus tag	PID	COG	COG group	Gene	Gene product	Localization	Position in H37Rv	Position from the beginning of the gene	Strand	H37Rv nucl.	CTRI-4(XDR) nucl.	H37Rv amino acid	CTRI-4(XDR) amino acid	Category
20714	Rv0014c	15607156	COG2815S	S	pknB	transmembrane serine/threonine-protein kinase B PKNB (protein kinase B) (STPK B)	Cytoplasmic Membrane	15890	1581	-	G	A	Ser	Ser	synonymous
20717	Rv0017c	15607159	COG0772D	D	rodA	cell division protein RodA	Cytoplasmic Membrane	21559	82	-	A	C	Phe	Val	nsSNP
20736	Rv0036c	15607178	-		-	hypothetical protein	Cytoplasmic Membrane	39684	146	-	A	G	Leu	Pro	nsSNP
20761	Rv0061	15607203	-		-	hypothetical protein	Cytoplasmic Membrane	65246	256	+	C	T	Leu	Leu	synonymous
20764	Rv0064	15607206	COG1615S	S	-	hypothetical protein	Cytoplasmic Membrane	69292	673	+	G	C	Ala	Pro	nsSNP
20765	Rv0065	15607207	COG4113R	R	-	hypothetical protein	Unknown	71914	94	+	T	C	Ser	Pro	nsSNP
20766	Rv0066c	15607208	COG2838C	C	icd2	isocitrate dehydrogenase	Cytoplasmic	73391	1121	-	T	G	Asp	Ala	nsSNP
20768	Rv0068	15607210	COG1028IQR	IQR	-	short chain dehydrogenase	Cytoplasmic	75940	640	+	G	C	Val	Leu	nsSNP
20808	Rv0107c	15607249	COG0474P	P	ctpI	cation-transporter ATPase I	Cytoplasmic Membrane	126631	3911	-	G	A	Ala	Val	nsSNP
20816	Rv0115	15607257	COG2605R	R	hddA	D-alpha-D-heptose-7-phosphate kinase	Cytoplasmic Membrane	139438	926	+	A	G	Asp	Gly	nsSNP
20828	Rv0127	15607269	COG3281G	G	-	hypothetical protein	Cytoplasmic	154990	759	+	G	T	Arg	Arg	synonymous
20837	Rv0136	15607278	COG2124Q	Q	cyp138	cytochrome P450 138	Cytoplasmic	163940	575	+	A	G	Lys	Arg	nsSNP
20844	Rv0143c	15607285	COG0038P	P	-	transmembrane protein	Cytoplasmic Membrane	168949	1234	-	C	T	Gly	Ser	nsSNP
20853	Rv0152c	57116695	-		PE2	PE family protein	Cytoplasmic Membrane	180248	649	-	C	T	Asp	Asn	nsSNP
20861	Rv0160c	57116697	-		PE4	PE family protein	Unknown	189155	1285	-	G	T	Leu	Met	nsSNP
20866	Rv0165c	57116700	COG1802K	K	-	GntR family transcriptional regulator	Cytoplasmic	194247	692	-	G	T	Ala	Glu	nsSNP
20904	Rv0202c	15607343	COG2409R	R	mmpL11	transmembrane transport protein MmpL11	Cytoplasmic Membrane	239733	1560	-	G	T	Phe	Leu	nsSNP
20913	Rv0211	15607352	COG1274C	C	pckA	phosphoenolpyruvate carboxykinase	Cytoplasmic	252900	1119	+	C	T	Asp	Asp	synonymous
20924	Rv0222	15607363	COG1024I	I	echA1	enoyl-CoA hydratase	Cytoplasmic Membrane	266248	742	+	G	T	Ala	Ser	nsSNP
20940	Rv0237	57116706	COG1472G	G	lpqI	lipoprotein LpqI	Cytoplasmic	287747	562	+	A	C	Thr	Pro	nsSNP
20947	Rv0244c	15607385	COG1960I	I	fadE5	acyl-CoA dehydrogenase FADE5	Cytoplasmic	294596	1038	-	T	G	Thr	Thr	synonymous
20981	Rv0278c	57116712	-		PE_PGRS3	PE-PGRS family protein	Cytoplasmic Membrane	334641	1670	-	G	C	Ala	Gly	nsSNP
20981	Rv0278c	57116712	-		PE_PGRS3	PE-PGRS family protein	Cytoplasmic Membrane	335044	1267	-	C	G	Gly	Arg	nsSNP
20987	Rv0284	15607425	COG1674D	D	-	hypothetical protein	Cytoplasmic Membrane	346693	1059	+	G	T	Ser	Ser	synonymous
21007	Rv0304c	57116719	-		PPE5	PPE family protein	Cellwall	369593	3172	-	C	T	Asp	Asn	nsSNP
21007	Rv0304c	57116719	-		PPE5	PPE family protein	Cellwall	370257	2508	-	G	C	Thr	Thr	synonymous
21011	Rv0308	15607449	COG0671I	I	-	integral membrane protein	Cytoplasmic Membrane	377302	190	+	C	T	Leu	Leu	synonymous
21014	Rv0311	15607452	-		-	hypothetical protein	Cytoplasmic	380097	926	+	C	T	Ala	Val	nsSNP
21014	Rv0311	15607452	-		-	hypothetical protein	Cytoplasmic	380098	927	+	C	T	Ala	Val	nsSNP
21026	Rv0323c	15607464	COG2120S	S	-	hypothetical protein	Cytoplasmic	390739	513	-	G	A	His	His	synonymous
21030	Rv0327c	15607468	COG2124Q	Q	cyp135A1	cytochrome P450 135A1	Cytoplasmic	393387	659	-	C	T	Arg	His	nsSNP
21046	Rv0343	15607484	COG0699R	R	iniC	isoniazid inductible gene protein INIC	Cytoplasmic Membrane	413173	417	+	C	T	Ala	Ala	synonymous
21050	Rv0347	15607488	-		-	hypothetical protein	Cytoplasmic	417766	463	+	G	T	Gly	Cys	nsSNP
21058	Rv0355c	57116726	COG5651N	N	PPE8	PPE family protein	Cytoplasmic Membrane	431296	3384	-	A	G	Ala	Ala	synonymous
21058	Rv0355c	57116726	COG5651N	N	PPE8	PPE family protein	Cytoplasmic Membrane	432150	2530	-	C	A	Gly	Cys	nsSNP
21063	Rv0360c	15607501	-		-	hypothetical protein	Unknown	438473	267	-	C	T	Trp	Ter	nsSNP
21075	Rv0372c	15607513	COG1975O	O	-	hypothetical protein	Cytoplasmic	449194	192	-	G	A	Gly	Gly	synonymous
21083	Rv0380c	15607521	COG0566J	J	-	RNA methyltransferase	Cytoplasmic Membrane	456299	521	-	C	G	Arg	Pro	nsSNP
21095	Rv0392c	15607533	COG1252C	C	ndhA	membrane NADH dehydrogenase	Cytoplasmic Membrane	472148	492	-	A	C	His	Gln	nsSNP
21122	Rv0419	15607560	COG2321R	R	lpqM	lipoprotein peptidase LpqM	Cytoplasmic Membrane	505843	758	+	A	G	Glu	Gly	nsSNP
21275	Rv0567	15607707	COG2226H	H	-	methyltransferase/methylase	Cytoplasmic	658547	227	+	C	G	Ser	Cys	nsSNP
21287	Rv0579	15607719	COG1656S	S	-	hypothetical protein	Cytoplasmic	676675	438	+	C	A	Arg	Arg	synonymous
21308	Rv0599c	15607739	COG2002K	K	-	hypothetical protein	Cytoplasmic	697798	3	-	C	T	Met	Ile	nsSNP
21332	Rv0622	57116762	-		-	hypothetical protein	Unknown	716025	656	+	C	T	Pro	Leu	nsSNP
21358	Rv0646c	15607786	COG0596R	R	lipG	lipase/esterase LipG	Unknown	740715	425	-	G	C	Thr	Ser	nsSNP
21366	Rv0654	15607794	COG3670Q	Q	-	dioxygenase	Cytoplasmic	750235	236	+	C	A	Ala	Asp	nsSNP
21379	Rv0667	15607807	COG0085K	K	rpoB	DNA-directed RNA polymerase subunit beta	Cytoplasmic	761110	1304	+	A	T	Asp	Val	nsSNP
21389	Rv0677c	15607817	-		mmpS5	hypothetical protein	Unknown	778743	163	-	C	T	Val	Met	nsSNP
21394	Rv0682	15607822	COG0048J	J	rpsL	30S ribosomal protein S12	Cytoplasmic	781822	263	+	A	G	Lys	Arg	nsSNP
21410	Rv0698	15607838	-		-	hypothetical protein	Cytoplasmic	798915	83	+	A	C	Gln	Pro	nsSNP
21422	Rv0710	15607850	COG0186J	J	rpsQ	30S ribosomal protein S17	Cytoplasmic	805961	206	+	A	G	Lys	Arg	nsSNP
21445	Rv0732	15607872	COG0201U	U	secY	preprotein translocase subunit SecY	Cytoplasmic Membrane	825655	856	+	C	A	His	Asn	nsSNP
21468	Rv0754	57116776	COG0406G	G	PE_PGRS11	PE-PGRS family protein	Unknown	846704	546	+	C	T	Thr	Thr	synonymous
21471	Rv0756c	15607896	-		-	hypothetical protein	Cytoplasmic	850878	589	-	C	G	Asp	His	nsSNP
21539	Rv0823c	15607963	COG0042J	J	-	transcriptional regulatory protein	Cytoplasmic	916994	653	-	G	A	Thr	Met	nsSNP
21539	Rv0823c	15607963	COG0042J	J	-	transcriptional regulatory protein	Cytoplasmic	917596	51	-	C	A	Pro	Pro	synonymous
21549	Rv0833	57116788	-		PE_PGRS13	PE-PGRS family protein	Unknown	926745	1385	+	C	G	Ala	Gly	nsSNP
21549	Rv0833	57116788	-		PE_PGRS13	PE-PGRS family protein	Unknown	926748	1388	+	C	A	Thr	Asn	nsSNP
21549	Rv0833	57116788	-		PE_PGRS13	PE-PGRS family protein	Unknown	926756	1396	+	T	G	Ser	Ala	nsSNP
21549	Rv0833	57116788	-		PE_PGRS13	PE-PGRS family protein	Unknown	926761	1401	+	T	C	Gly	Gly	synonymous
21558	Rv0842	15607982	-		-	integral membrane protein	Cytoplasmic Membrane	938240	129	+	G	C	Pro	Pro	synonymous
21575	Rv0859	15607999	COG0183I	I	fadA	acetyl-CoA acetyltransferase	Cytoplasmic	955127	51	+	A	C	Lys	Asn	nsSNP
21604	Rv0888	15608028	-		-	hypothetical protein	Unknown	988005	773	+	A	G	Asn	Ser	nsSNP
21608	Rv0892	15608032	COG2072P	P	-	monooxygenase	Cytoplasmic Membrane	994382	530	+	C	T	Thr	Ile	nsSNP
21639	Rv0923c	15608063	COG4195R	R	-	hypothetical protein	Cytoplasmic	1030418	160	-	C	T	Ala	Thr	nsSNP
21640	Rv0924c	57116797	COG1914P	P	mntH	manganese transport protein MntH	Cytoplasmic Membrane	1030755	1110	-	C	T	Gln	Gln	synonymous
21654	Rv0938	15608078	COG3285L	L	-	ATP-dependent DNA ligase	Cytoplasmic	1047873	1738	+	C	T	Leu	Leu	synonymous
21660	Rv0944	15608084	COG0266L	L	-	formamidopyrimidine-DNA glycosylase	Cytoplasmic	1053912	148	+	T	C	Tyr	His	nsSNP
21669	Rv0954	15608094	-		-	transmembrane protein	Cytoplasmic Membrane	1065793	667	+	T	G	Tyr	Asp	nsSNP
21705	Rv0989c	15608129	COG0142H	H	grcC2	polyprenyl-diphosphate synthase	Cytoplasmic	1106614	769	-	G	T	Leu	Met	nsSNP
21784	Rv1067c	57116818	-		PE_PGRS19	PE-PGRS family protein	Cytoplasmic Membrane	1190093	332	-	A	C	Leu	Trp	nsSNP
21790	Rv1073	15608213	-		-	hypothetical protein	Cytoplasmic	1197567	337	+	G	C	Val	Leu	nsSNP
21794	Rv1077	57116820	COG0031E	E	cbs	cystathionine beta-synthase CBS (Serine sulfhydrase) (Beta-thionase) (hemoprotein H-450)	Cytoplasmic	1201946	230	+	T	C	Val	Ala	nsSNP
21801	Rv1084	15608224	COG1331O	O	-	hypothetical protein	Cytoplasmic Membrane	1207830	195	+	C	T	His	His	synonymous
21828	Rv1109c	15608249	-		-	hypothetical protein	Unknown	1235834	262	-	C	T	Gly	Arg	nsSNP
21843	Rv1123c	15608263	COG0596R	R	bpoB	peroxidase BpoB	Cytoplasmic Membrane	1246500	553	-	C	T	Glu	Lys	nsSNP
21863	Rv1142c	15608282	COG1024I	I	echA10	enoyl-CoA hydratase	Unknown	1269783	176	-	T	C	Lys	Arg	nsSNP
21873	Rv1153c	15608293	COG3315Q	Q	omt	O-methyltransferase	Cytoplasmic Membrane	1280302	545	-	G	C	Thr	Arg	nsSNP
21874	Rv1154c	15608294	COG3797S	S	-	hypothetical protein	Cytoplasmic Membrane	1281314	171	-	C	T	Met	Ile	nsSNP
21890	Rv1169c	57116837	-		PE11	PE family protein	Unknown	1299999	126	-	G	T	Pro	Pro	synonymous
21891	Rv1170	15608310	COG2120S	S	mshB	N-Acetyl-1-D-myo-Inosityl-2-amino-2-deoxy-alpha- D-glucopyranoside deacetylase mshB (GlcNAc-Ins deacetylase)	Unknown	1301002	699	+	G	A	Ala	Ala	synonymous
21893	Rv1172c	57116839	-		PE12	PE family protein	Cytoplasmic Membrane	1302482	200	-	C	T	Arg	Gln	nsSNP
21943	Rv1222	15608362	-		-	hypothetical protein	Unknown	1365722	379	+	C	G	Pro	Ala	nsSNP
21944	Rv1223	57116844	COG0265O	O	htrA	serine protease HtrA	Unknown	1366312	438	+	G	A	Gly	Gly	synonymous
21984	Rv1263	15608403	COG0154J	J	amiB2	amidase	Cytoplasmic	1411210	780	+	T	G	Val	Val	synonymous
21987	Rv1266c	15608406	COG0515RTKL	RTKL	pknH	transmembrane serine/threonine-protein kinase H	Cytoplasmic	1414021	1820	-	C	T	Arg	Gln	nsSNP
22006	Rv1285	15608425	COG0175EH	EH	cysD	sulfate adenylyltransferase subunit 2	Cytoplasmic	1438821	913	+	C	G	Arg	Ala	nsSNP
22006	Rv1285	15608425	COG0175EH	EH	cysD	sulfate adenylyltransferase subunit 2	Cytoplasmic	1438822	914	+	G	C	Arg	Ala	nsSNP
22015	Rv1293	15608433	COG0019E	E	lysA	diaminopimelate decarboxylase LysA	Cytoplasmic	1448330	303	+	G	T	Ala	Ala	synonymous
22028	Rv1306	15608446	COG0711C	C	atpF	F0F1 ATP synthase subunit B	Unknown	1461689	369	+	A	G	Ala	Ala	synonymous
22041	Rv1319c	15608459	COG2114T	T	-	adenylate cyclase	Cytoplasmic Membrane	1480972	1530	-	T	C	Glu	Glu	synonymous
22069	Rv1346	15608486	COG1960I	I	fadE14	acyl-CoA dehydrogenase	Cytoplasmic	1511460	615	+	C	T	Thr	Thr	synonymous
22076	Rv1353c	15608493	COG1309K	K	-	transcriptional regulatory protein	Cytoplasmic	1519245	741	-	G	C	Ala	Ala	synonymous
22091	Rv1368	15608508	-		lprF	lipoprotein LprF	Cytoplasmic Membrane	1541426	407	+	G	T	Arg	Leu	nsSNP
22114	Rv1391	15608530	COG0452H	H	dfp	bifunctional phosphopantothenoylcysteine decarboxylase/phosphopantothenate synthase	Cytoplasmic	1565566	126	+	C	T	Pro	Pro	synonymous
22154	Rv1431	15608569	-		-	hypothetical protein	Cytoplasmic Membrane	1608258	176	+	C	T	Ala	Val	nsSNP
22215	Rv1490	15608628	-		-	hypothetical protein	Cytoplasmic Membrane	1679363	42	+	C	T	Asp	Asp	synonymous
22251	Rv1523	15608661	COG2226H	H	-	methyltransferase	Unknown	1718152	500	+	T	C	Val	Ala	nsSNP
22264	Rv1536	15608674	COG0060J	J	ileS	isoleucyl-tRNA synthetase	Cytoplasmic	1736662	144	+	C	A	Phe	Leu	nsSNP
22264	Rv1536	15608674	COG0060J	J	ileS	isoleucyl-tRNA synthetase	Cytoplasmic	1737576	1058	+	C	A	Ala	Glu	nsSNP
22269	Rv1541c	15608679	COG4461S	S	lprI	lipoprotein LprI	Unknown	1744039	333	-	T	A	Ala	Ala	synonymous
22275	Rv1547	15608685	COG0587L	L	dnaE	DNA polymerase III subunit alpha	Cytoplasmic	1750386	2693	+	C	T	Ser	Leu	nsSNP
22278	Rv1550	15608688	COG1022I	I	fadD11	fatty-acid-CoA ligase	Cytoplasmic	1755221	1506	+	C	T	Asn	Asn	synonymous
22280	Rv1552	15608690	COG1053C	C	frdA	fumarate reductase flavoprotein subunit	Cytoplasmic Membrane	1758588	908	+	A	G	Asp	Gly	nsSNP
22285	Rv1557	15608695	COG2409R	R	mmpL6	transmembrane transport protein MmpL6	Cytoplasmic Membrane	1762216	473	+	C	G	Ala	Gly	nsSNP
22287	Rv1559	15608697	COG1171E	E	ilvA	threonine dehydratase	Cytoplasmic	1763647	220	+	T	C	Leu	Leu	synonymous
22298	Rv1570	15608708	COG0132H	H	bioD	dithiobiotin synthetase	Unknown	1778260	402	+	G	C	Ala	Ala	synonymous
22317	Rv1589	15608727	COG0502H	H	bioB	biotin synthase	Cytoplasmic	1790479	196	+	C	G	Arg	Gly	nsSNP
22358	Rv1630	15608768	COG0539J	J	rpsA	30S ribosomal protein S1	Cytoplasmic	1833909	368	+	A	C	Asp	Ala	nsSNP
22390	Rv1661	15608799	COG3321Q	Q	pks7	polyketide synthase pks7	Cytoplasmic Membrane	1880558	5255	+	T	C	Val	Ala	nsSNP
22390	Rv1661	15608799	COG3321Q	Q	pks7	polyketide synthase pks7	Cytoplasmic Membrane	1881530	6227	+	T	G	Leu	Arg	nsSNP
22401	Rv1672c	15608810	COG2271G	G	-	integral membrane transport protein	Cytoplasmic Membrane	1897733	475	-	C	T	Gly	Ser	nsSNP
22412	Rv1683	15608821	COG3243I	I	-	acyl-CoA synthetase	Cytoplasmic	1909325	1732	+	G	A	Ala	Thr	nsSNP
22421	Rv1692	15608830	COG0647G	G	-	phosphatase	Cytoplasmic	1917506	809	+	C	T	Pro	Leu	nsSNP
22433	Rv1704c	15608842	COG1113E	E	cycA	D-serine/alanine/glycine transporter protein CycA	Cytoplasmic Membrane	1931224	233	-	G	A	Ser	Leu	nsSNP
22437	Rv1707	15608845	COG0659P	P	-	transmembrane protein	Cytoplasmic Membrane	1935437	556	+	C	T	Pro	Ser	nsSNP
22445	Rv1715	57116901	COG1250I	I	fadB3	3-hydroxybutyryl-CoA dehydrogenase FADB3	Cytoplasmic	1943010	352	+	G	A	Glu	Lys	nsSNP
22445	Rv1715	57116901	COG1250I	I	fadB3	3-hydroxybutyryl-CoA dehydrogenase FADB3	Cytoplasmic	1943220	562	+	T	C	Trp	Arg	nsSNP
22520	Rv1789	57116911	COG5651N	N	PPE26	PPE family protein	Cytoplasmic Membrane	2027030	241	+	G	A	Ala	Thr	nsSNP
22526	Rv1796	15608933	COG1404O	O	mycP5	proline rich membrane-anchored mycosin MYCP5 (serine protease) (subtilisin-like protease) (subtilase-like) (mycosin-5)	Cytoplasmic Membrane	2035018	1290	+	C	T	Ser	Ser	synonymous
22566	Rv1836c	15608973	-		-	hypothetical protein	Cytoplasmic Membrane	2082879	1758	-	C	T	Met	Ile	nsSNP
22590	Rv1860	57116926	-		apa	hypothetical protein	Extracellular	2108219	484	+	G	A	Asp	Asn	nsSNP
22596	Rv1866	15609003	COG1804C	C	-	hypothetical protein	Cytoplasmic	2115234	2095	+	G	T	Asp	Tyr	nsSNP
22604	Rv1874	15609011	-		-	hypothetical protein	Cytoplasmic Membrane	2123872	189	+	G	A	Gln	Gln	synonymous
22620	Rv1889c	15609026	COG3315Q	Q	-	hypothetical protein	Unknown	2138736	282	-	G	A	Phe	Phe	synonymous
22622	Rv1891	15609028	-		-	hypothetical protein	Cytoplasmic Membrane	2140076	336	+	G	A	Met	Ile	nsSNP
22625	Rv1894c	15609031	COG2070R	R	-	hypothetical protein	Cytoplasmic	2141368	502	-	C	T	Val	Met	nsSNP
22639	Rv1908c	15609045	COG0376P	P	katG	catalase-peroxidase-peroxynitritase T KATG	Cytoplasmic	2155168	944	-	C	G	Ser	Thr	nsSNP
22642	Rv1911c	15609048	COG1881R	R	lppC	lipoprotein LppC	Unknown	2157509	479	-	C	T	Arg	Gln	nsSNP
22645	Rv1914c	15609051	-		-	hypothetical protein	Cytoplasmic Membrane	2160094	235	-	C	T	Val	Met	nsSNP
22665	Rv1934c	15609071	COG1960I	I	fadE17	acyl-CoA dehydrogenase FADE17	Cytoplasmic	2185009	1180	-	C	T	Glu	Lys	nsSNP
22665	Rv1934c	15609071	COG1960I	I	fadE17	acyl-CoA dehydrogenase FADE17	Cytoplasmic	2186088	101	-	A	C	Leu	Arg	nsSNP
22666	Rv1935c	15609072	COG1024I	I	echA13	enoyl-CoA hydratase	Cytoplasmic	2186632	528	-	A	G	Asp	Asp	synonymous
22687	Rv1956	15609093	COG3620K	K	-	transcriptional regulatory protein	Cytoplasmic	2202200	63	+	T	C	Ala	Ala	synonymous
22724	Rv1992c	15609129	COG2217P	P	ctpG	metal cation transporter P-type ATPase G CtpG	Cytoplasmic Membrane	2235405	1902	-	A	G	Ala	Ala	synonymous
22748	Rv2016	15609153	-		-	hypothetical protein	Cytoplasmic	2263465	40	+	G	T	Gly	Cys	nsSNP
22760	Rv2028c	15609165	-		-	hypothetical protein	Cytoplasmic Membrane	2274673	736	-	C	T	Ala	Thr	nsSNP
22762	Rv2030c	15609167	COG2312R	R	-	hypothetical protein	Cytoplasmic	2278060	427	-	C	T	Val	Ile	nsSNP
22764	Rv2032	15609169	-		acg	hypothetical protein	Cytoplasmic	2279594	466	+	G	A	Asp	Asn	nsSNP
22767	Rv2035	15609172	COG3832S	S	-	hypothetical protein	Cytoplasmic	2281773	160	+	G	A	Ala	Thr	nsSNP
22775	Rv2043c	15609180	COG1335Q	Q	pncA	pyrazinamidase/nicotinamidas PNCA (PZase)	Cytoplasmic	2289090	152	-	T	G	His	Pro	nsSNP
22794	Rv2062c	15609199	COG1429H	H	cobN	cobaltochelatase subunit CobN	Cytoplasmic	2320078	676	-	C	T	Ala	Thr	nsSNP
22794	Rv2062c	15609199	COG1429H	H	cobN	cobaltochelatase subunit CobN	Cytoplasmic	2320490	264	-	G	A	Thr	Thr	synonymous
22814	Rv2081c	15609218	-		-	transmembrane protein	Cytoplasmic Membrane	2338194	312	-	A	C	Gly	Gly	synonymous
22814	Rv2081c	15609218	-		-	transmembrane protein	Cytoplasmic Membrane	2338203	303	-	A	C	Gly	Gly	synonymous
22864	Rv2133c	15609270	-		-	hypothetical protein	Cytoplasmic	2394042	598	-	T	C	Ile	Val	nsSNP
22893	Rv2161c	15609298	COG2141C	C	-	hypothetical protein	Cytoplasmic	2423040	98	-	A	G	Val	Ala	nsSNP
22896	Rv2164c	15609301	-		-	hypothetical protein	Cytoplasmic	2427481	758	-	G	C	Pro	Arg	nsSNP
22912	Rv2180c	15609317	-		-	integral membrane protein	Cytoplasmic Membrane	2443093	122	-	T	C	His	Arg	nsSNP
22922	Rv2190c	15609327	COG0791M	M	-	hypothetical protein	Extracellular	2452778	495	-	A	T	Ala	Ala	synonymous
22930	Rv2198c	15609335	-		mmpS3	membrane protein	Unknown	2462161	887	-	T	C	Gln	Arg	nsSNP
22944	Rv2212	15609349	COG2114T	T	-	hypothetical protein	Cytoplasmic	2478080	891	+	G	A	Thr	Thr	synonymous
22946	Rv2214c	15609351	COG0300R	R	ephD	short chain dehydrogenase	Cytoplasmic	2480413	1289	-	G	A	Ala	Val	nsSNP
22996	Rv2263	15609400	COG1028IQR	IQR	-	short chain dehydrogenase	Cytoplasmic	2535713	73	+	G	A	Gly	Ser	nsSNP
23013	Rv2280	15609417	COG0277C	C	-	dehydrogenase	Unknown	2551574	15	+	A	C	Thr	Thr	synonymous
23067	Rv2329c	15609466	COG2223P	P	narK1	nitrite extrusion protein 1 NarK1	Cytoplasmic Membrane	2602454	1008	-	T	G	Ile	Ile	synonymous
23080	Rv2341	15609478	-		lppQ	lipoprotein LppQ	Cytoplasmic Membrane	2619799	203	+	A	C	Glu	Ala	nsSNP
23096	Rv2357c	15609494	COG0423J	J	glyS	glycyl-tRNA synthetase	Cytoplasmic	2640807	258	-	G	A	Val	Val	synonymous
23114	Rv2375	15609512	COG5450K	K	-	hypothetical protein	Cytoplasmic	2655390	126	+	C	A	Leu	Leu	synonymous
23133	Rv2394	15609531	COG0405E	E	ggtB	gamma-glutamyltranspeptidase precursor GgtB	Extracellular	2689603	1594	+	G	C	Val	Leu	nsSNP
23163	Rv2423	15609560	COG0030J	J	-	hypothetical protein	Cytoplasmic	2719647	51	+	G	C	Ala	Ala	synonymous
23169	Rv2429	15609566	COG2128S	S	ahpD	alkyl hydroperoxide reductase subunit D	Unknown	2726811	6	+	T	C	Ser	Ser	synonymous
23269	Rv2528c	15609665	COG1715V	V	mrr	restriction system protein mrr	Cytoplasmic	2852598	74	-	G	C	Ala	Gly	nsSNP
23303	Rv2561	15609698	-		-	hypothetical protein	Unknown	2881542	134	+	C	G	Ala	Gly	nsSNP
23305	Rv2563	15609700	-		-	glutamine-transport transmembrane protein ABC transporter	Cytoplasmic Membrane	2883217	928	+	G	C	Val	Leu	nsSNP
23321	Rv2579	57117001	COG0596R	R	dhaA	haloalkane dehalogenase	Cytoplasmic	2903643	5	+	C	A	Thr	Lys	nsSNP
23328	Rv2586c	15609723	COG0341U	U	secF	preprotein translocase subunit SecF	Cytoplasmic Membrane	2913777	235	-	T	C	Ile	Val	nsSNP
23350	Rv2607	15609744	COG0259H	H	pdxH	pyridoxamine 5'-phosphate oxidase	Cytoplasmic	2934447	250	+	G	A	Asp	Asn	nsSNP
23422	Rv2678c	15609815	COG0407H	H	hemE	uroporphyrinogen decarboxylase	Cytoplasmic	2994304	759	-	G	A	Gly	Gly	synonymous
23432	Rv2688c	15609825	COG1131V	V	-	antibiotic ABC transporter ATP-binding protein	Cytoplasmic Membrane	3005014	637	-	A	G	Cys	Arg	nsSNP
23489	Rv2744c	57117019	COG1842KT	KT	35kd_ag	hypothetical protein	Cytoplasmic	3057256	808	-	G	A	Gln	Ter	nsSNP
23509	Rv2764c	15609901	COG0207F	F	thyA	thymidylate synthase	Cytoplasmic	3074122	350	-	T	C	Asp	Gly	nsSNP
23535	Rv2790c	15609927	COG0183I	I	ltp1	lipid-transfer protein	Cytoplasmic	3100017	153	-	G	A	Arg	Arg	synonymous
23537	Rv2792c	15609929	COG2452L	L	-	resolvase	Cytoplasmic	3101650	513	-	G	C	Gly	Gly	synonymous
23565	Rv2820c	15609957	COG1567L	L	-	hypothetical protein	Unknown	3127931	342	-	T	A	Lys	Asn	nsSNP
23566	Rv2821c	15609958	COG1337L	L	-	hypothetical protein	Cytoplasmic	3128345	619	-	C	G	Val	Leu	nsSNP
23570	Rv2825c	15609962	COG4293S	S	-	hypothetical protein	Cytoplasmic	3133016	524	-	C	G	Arg	Thr	nsSNP
23570	Rv2825c	15609962	COG4293S	S	-	hypothetical protein	Cytoplasmic	3133065	475	-	A	G	Leu	Leu	synonymous
23570	Rv2825c	15609962	COG4293S	S	-	hypothetical protein	Cytoplasmic	3133066	474	-	G	C	Val	Val	synonymous
23570	Rv2825c	15609962	COG4293S	S	-	hypothetical protein	Cytoplasmic	3133075	465	-	T	C	Lys	Arg	nsSNP
23570	Rv2825c	15609962	COG4293S	S	-	hypothetical protein	Cytoplasmic	3133076	464	-	T	C	Lys	Arg	nsSNP
23570	Rv2825c	15609962	COG4293S	S	-	hypothetical protein	Cytoplasmic	3133077	463	-	T	G	Lys	Arg	nsSNP
23570	Rv2825c	15609962	COG4293S	S	-	hypothetical protein	Cytoplasmic	3133078	462	-	G	A	His	His	synonymous
23571	Rv2826c	15609963	COG2253S	S	-	hypothetical protein	Cytoplasmic	3134017	577	-	G	T	Arg	Arg	synonymous
23584	Rv2839c	15609976	COG0532J	J	infB	translation initiation factor IF-2	Cytoplasmic	3146485	1389	-	G	T	Thr	Thr	synonymous
23584	Rv2839c	15609976	COG0532J	J	infB	translation initiation factor IF-2	Cytoplasmic	3147511	363	-	T	G	Ala	Ala	synonymous
23597	Rv2852c	15609989	COG0579R	R	mqo	malate:quinone oxidoreductase	Cellwall	3162021	41	-	G	C	Ala	Gly	nsSNP
23606	Rv2861c	57117031	COG0024J	J	mapB	methionine aminopeptidase	Cytoplasmic	3173283	735	-	T	G	Ala	Ala	synonymous
23660	Rv2915c	15610052	COG1228Q	Q	-	hypothetical protein	Cytoplasmic	3223646	1035	-	G	A	Ala	Ala	synonymous
23693	Rv2946c	15610083	COG3321Q	Q	pks1	polyketide synthase PKS1	Cytoplasmic Membrane	3292834	3520	-	C	A	Glu	Ter	nsSNP
23703	Rv2956	15610093	-		-	hypothetical protein	Cytoplasmic	3308922	255	+	G	T	Thr	Thr	synonymous
23706	Rv2959c	15610096	COG3510V	V	-	methyltransferase (methylase)	Cytoplasmic	3312401	438	-	A	C	Ile	Met	nsSNP
23765	Rv3016	15610153	-		lpqA	lipoprotein LpqA	Cytoplasmic	3375807	50	+	T	C	Ile	Thr	nsSNP
23807	Rv3057c	15610194	COG4221R	R	-	short chain dehydrogenase	Cytoplasmic	3418386	277	-	C	T	Val	Met	nsSNP
23823	Rv3073c	15610210	COG3189S	S	-	hypothetical protein	Cytoplasmic	3436380	306	-	G	A	His	His	synonymous
23825	Rv3075c	15610212	COG2301G	G	-	hypothetical protein	Cytoplasmic	3438664	310	-	G	C	Pro	Ala	nsSNP
23837	Rv3087	15610224	-		-	hypothetical protein	Cytoplasmic	3453679	755	+	A	C	Glu	Ala	nsSNP
23854	Rv3104c	15610241	COG0668M	M	-	transmembrane protein	Cytoplasmic Membrane	3472290	489	-	G	A	Asn	Asn	synonymous
23857	Rv3107c	15610244	COG0277C	C	agpS	alkyldihydroxyacetonephosphate synthase AgpS	Cytoplasmic	3475877	1085	-	G	A	Thr	Ile	nsSNP
23866	Rv3116	57117059	COG0476H	H	moeB2	molybdenum cofactor biosynthesis protein MoeB	Cytoplasmic	3483136	361	+	A	G	Thr	Ala	nsSNP
23886	Rv3137	15610273	COG0483G	G	-	monophosphatase	Unknown	3503569	177	+	G	A	Arg	Arg	synonymous
23900	Rv3151	15610287	COG1034C	C	nuoG	NADH dehydrogenase subunit G	Cytoplasmic	3518392	1647	+	G	A	Ala	Ala	synonymous
23907	Rv3158	15610294	COG1007C	C	nuoN	NADH dehydrogenase subunit N	Cytoplasmic Membrane	3526873	1084	+	G	T	Ala	Ser	nsSNP
23908	Rv3159c	57117067	COG5651N	N	PPE53	PPE family protein	Extracellular	3529067	97	-	G	C	Arg	Gly	nsSNP
23920	Rv3171c	15610307	COG0596R	R	hpx	non-Heme haloperoxidase Hpx	Cytoplasmic	3539878	868	-	G	C	Arg	Gly	nsSNP
23953	Rv3201c	15610337	COG0210L	L	-	ATP-dependent DNA helicase	Cytoplasmic	3576404	633	-	G	A	Asp	Asp	synonymous
23956	Rv3204	15610340	COG3695L	L	-	DNA-methyltransferase (modification methylase)	Cytoplasmic	3581476	162	+	C	T	Pro	Pro	synonymous
23957	Rv3205c	15610341	-		-	hypothetical protein	Cytoplasmic	3581967	539	-	G	C	Ala	Gly	nsSNP
23958	Rv3206c	57117072	COG0476H	H	moeB1	molybdopterin biosynthesis-like protein MoeZ	Cytoplasmic	3583542	169	-	T	G	Thr	Pro	nsSNP
23966	Rv3213c	15610349	COG1192D	D	-	SOJ/PARA-like protein	Cytoplasmic Membrane	3590692	801	-	C	T	Ter	Ter	synonymous
23971	Rv3218	15610354	COG1597IR	IR	-	hypothetical protein	Unknown	3594914	447	+	G	A	Met	Ile	nsSNP
23985	Rv3229c	57117078	COG3239I	I	-	linoleoyl-CoA desaturase	Cytoplasmic	3606019	1016	-	G	A	Thr	Met	nsSNP
24001	Rv3245c	15610381	COG0642T	T	mtrB	two component sensory transduction histidine kinase MTRB	Cytoplasmic Membrane	3625797	817	-	C	G	Val	Leu	nsSNP
24004	Rv3248c	15610384	COG0499H	H	sahH	S-adenosyl-L-homocysteine hydrolase	Cytoplasmic	3629603	45	-	A	C	Val	Val	synonymous
24010	Rv3254	15610390	COG0654HC	HC	-	hypothetical protein	Cytoplasmic Membrane	3633961	287	+	G	A	Gly	Glu	nsSNP
24029	Rv3273	15610409	COG0659P	P	-	transmembrane carbonic anhydrase	Cytoplasmic Membrane	3656810	2174	+	T	C	Leu	Pro	nsSNP
24058	Rv3302c	15610438	COG0578C	C	glpD2	glycerol-3-phosphate dehydrogenase	Cytoplasmic	3688680	763	-	A	G	Leu	Leu	synonymous
24098	Rv3341	15610477	COG2021E	E	metX	homoserine O-acetyltransferase	Cytoplasmic	3727498	11	+	C	T	Ser	Phe	nsSNP
24100	Rv3343c	57117092	COG5651N	N	PPE54	PPE family protein	Cytoplasmic Membrane	3734189	2747	-	A	T	Leu	His	nsSNP
24104	Rv3347c	57117095	COG5651N	N	PPE55	PPE family protein	Cytoplasmic Membrane	3749061	4124	-	T	G	His	Pro	nsSNP
24107	Rv3350c	57117096	COG5651N	N	PPE56	PPE family protein	Cytoplasmic Membrane	3759659	7444	-	C	T	Gly	Ser	nsSNP
24135	Rv3378c	15610514	-		-	hypothetical protein	Cytoplasmic	3792765	484	-	C	A	Gly	Cys	nsSNP
24144	Rv3387	15610523	COG3039L	L	-	transposase	Cytoplasmic	3801103	318	+	G	T	Pro	Pro	synonymous
24161	Rv3403c	15610539	COG4529S	S	-	hypothetical protein	Cytoplasmic	3823194	670	-	T	C	Asn	Asp	nsSNP
24166	Rv3408	15610544	COG1848R	R	-	hypothetical protein	Unknown	3826758	211	+	A	T	Ile	Phe	nsSNP
24186	Rv3428c	15610564	COG4584L	L	-	transposase	Cytoplasmic Membrane	3845068	903	-	G	C	Tyr	Ter	nsSNP
24263	Rv3505	15610641	COG1960I	I	fadE27	acyl-CoA dehydrogenase FADE27	Cytoplasmic	3924670	973	+	A	C	Ile	Leu	nsSNP
24269	Rv3511	57117116	-		PE_PGRS55	PE-PGRS family protein	Unknown	3941103	1487	+	G	A	Gly	Asp	nsSNP
24312	Rv3554	15610690	COG3239I	I	fdxB	electron transfer protein FdxB	Cytoplasmic Membrane	3993756	1072	+	G	C	Val	Leu	nsSNP
24389	Rv3630	15610766	-		-	integral membrane protein	Cytoplasmic Membrane	4069757	583	+	T	C	Trp	Arg	nsSNP
24431	Rv3672c	15610808	COG0494LR	LR	-	hypothetical protein	Cytoplasmic Membrane	4114335	8	-	G	C	Ala	Gly	nsSNP
24440	Rv3680	15610816	COG0003P	P	-	anion transporter ATPase	Cytoplasmic Membrane	4119971	177	+	G	A	Lys	Lys	synonymous
24471	Rv3710	161352459	COG0119E	E	leuA	2-isopropylmalate synthase		4155324	1465	+	G	A	Gly	Arg	nsSNP
24491	Rv3729	15610865	COG1964R	R	-	transferase	Cytoplasmic	4179123	839	+	G	A	Arg	Gln	nsSNP
24554	Rv3790	15610926	COG0277C	C	-	oxidoreductase	Unknown	4235861	83	+	G	A	Arg	His	nsSNP
24559	Rv3795	15610931	-		embB	integral membrane indolylacetylinositol arabinosyltransferase EMBB (arabinosylindolylacetylinositol synthase)	Cytoplasmic Membrane	4247429	916	+	A	G	Met	Val	nsSNP
24572	Rv3808c	15610944	COG1216R	R	glfT	bifunctional UDP-galactofuranosyl transferase GLFT	Cytoplasmic	4270677	1603	-	C	T	Ala	Thr	nsSNP
24573	Rv3809c	15610945	COG0562M	M	glf	UDP-galactopyranose mutase Glf	Cytoplasmic	4272480	996	-	G	A	Thr	Thr	synonymous
24592	Rv3828c	15610964	COG2452L	L	-	resolvase	Cytoplasmic	4302926	472	-	C	G	Ala	Pro	nsSNP
24651	Rv3887c	15611023	-		-	transmembrane protein	Cytoplasmic Membrane	4370678	1007	-	T	C	Asp	Gly	nsSNP
24651	Rv3887c	15611023	-		-	transmembrane protein	Cytoplasmic Membrane	4371391	294	-	A	C	Ala	Ala	synonymous
24658	Rv3894c	15611030	COG1674D	D	-	hypothetical protein	Cytoplasmic Membrane	4377999	2454	-	C	A	Pro	Pro	synonymous
24666	Rv3902c	15611038	-		-	hypothetical protein	Unknown	4387563	333	-	G	A	Ser	Ser	synonymous
24675	Rv3911	15611047	COG1595K	K	sigM	RNA polymerase sigma factor SigM	Unknown	4400839	654	+	T	C	Tyr	Tyr	synonymous
24677	Rv3913	15611049	COG0492O	O	trxB2	thioredoxin reductase TRXB2	Cytoplasmic	4401878	151	+	G	A	Ala	Thr	nsSNP
24682	Rv3918c	57117171	COG1192D	D	parA	chromosome partitioning protein ParA	Cytoplasmic Membrane	4407119	413	-	G	A	Ser	Phe	nsSNP
23562	Rv2817c	15609954	COG1518L	L	-	hypothetical protein	Cytoplasmic	3124014	970	-	A	C	Ser	Ala	nsSNP
23569	Rv2824c	15609961	COG5551S	S	-	hypothetical protein	Cytoplasmic Membrane	3132112	603	-	C	T	Trp	Ter	nsSNP
23609	Rv2864c	15610001	COG0768M	M	-	penicillin-binding lipoprotein	Cytoplasmic Membrane	3175964	1302	-	C	G	Leu	Leu	synonymous
23619	Rv2874	15610011	COG0785O	O	dipZ	integral membrane C-type cytochrome biogenesis protein DipZ	Cytoplasmic Membrane	3186664	1818	+	A	C	Ala	Ala	synonymous
23632	Rv2887	15610024	COG1846K	K	-	transcriptional regulatory protein	Cytoplasmic	3196785	355	+	G	A	Ala	Thr	nsSNP
23634	Rv2889c	15610026	COG0264J	J	tsf	elongation factor Ts	Cytoplasmic	3198496	612	-	G	A	Ile	Ile	synonymous
23650	Rv2905	15610042	-		lppW	alanine rich lipoprotein LppW	Cytoplasmic Membrane	3214966	339	+	T	C	Ile	Ile	synonymous
23655	Rv2910c	15610047	-		-	hypothetical protein	Cytoplasmic	3218122	149	-	A	C	Ile	Ser	nsSNP
23666	Rv2921c	15610058	COG0552U	U	ftsY	cell division protein FtsY	Cytoplasmic Membrane	3233940	200	-	G	C	Ala	Gly	nsSNP
23679	Rv2933	15610070	COG3321Q	Q	ppsC	phenolpthiocerol synthesis type-I polyketide synthase PPSC	Cytoplasmic Membrane	3257233	1549	+	G	A	Asp	Asn	nsSNP
23679	Rv2933	15610070	COG3321Q	Q	ppsC	phenolpthiocerol synthesis type-I polyketide synthase PPSC	Cytoplasmic Membrane	3257531	1847	+	G	A	Arg	His	nsSNP
23692	Rv2945c	15610082	-		lppX	lipoprotein LppX	Cytoplasmic Membrane	3290870	456	-	G	C	Ser	Ser	synonymous
23703	Rv2956	15610093	-		-	hypothetical protein	Cytoplasmic	3309275	608	+	C	G	Pro	Arg	nsSNP
23709	Rv2962c	15610099	COG1819GC	GC	-	glycosyl transferase	Cytoplasmic Membrane	3314399	724	-	G	T	Leu	Met	nsSNP
23773	Rv3023c	15610160	COG3328L	L	-	transposase	Cytoplasmic	3381641	982	-	G	T	Gln	Lys	nsSNP
23781	Rv3031	15610168	COG1543S	S	-	hypothetical protein	Cytoplasmic	3391074	1153	+	G	C	Val	Leu	nsSNP
23794	Rv3044	15610181	COG0614P	P	fecB	FEIII-dicitrate-binding periplasmic lipoprotein	Unknown	3406045	910	+	G	A	Ala	Thr	nsSNP
23810	Rv3060c	15610197	COG2186K	K	-	GntR family transcriptional regulator	Cytoplasmic Membrane	3422104	1110	-	G	A	Val	Val	synonymous
23810	Rv3060c	15610197	COG2186K	K	-	GntR family transcriptional regulator	Cytoplasmic Membrane	3422687	527	-	G	A	Thr	Ile	nsSNP
23830	Rv3080c	15610217	COG2909K	K	pknK	serine/threonine-protein kinase transcriptional regulatory protein	Cytoplasmic Membrane	3442970	3019	-	C	T	Ala	Thr	nsSNP
23832	Rv3082c	15610219	COG2207K	K	virS	virulence-regulating transcriptional regulator VirS	Cytoplasmic	3447800	627	-	G	T	Asp	Glu	nsSNP
23847	Rv3097c	57117054	COG0657I	I	lipY	triacylglycerol lipase	Cytoplasmic Membrane	3466646	446	-	C	T	Gly	Glu	nsSNP
23850	Rv3100c	15610237	COG0691O	O	smpB	SsrA-binding protein	Cytoplasmic	3469694	90	-	G	T	Ala	Ala	synonymous
23852	Rv3102c	15610239	COG2884D	D	ftsE	putative cell division ATP-binding protein FTSE (septation component-transport ATP-binding protein ABC transporter)	Cytoplasmic Membrane	3471151	219	-	G	A	Arg	Arg	synonymous
23856	Rv3106	15610243	COG0493ER	ER	fprA	NADPH:adrenodoxin oxidoreductase FPRA (NADPH-ferredoxin reductase)	Cytoplasmic	3475324	1318	+	C	G	Pro	Ala	nsSNP
23881	Rv3132c	15610268	COG4585T	T	devS	two component sensor histidine kinase DEVS	Cytoplasmic Membrane	3498364	902	-	T	C	Asn	Ser	nsSNP
23920	Rv3171c	15610307	COG0596R	R	hpx	non-Heme haloperoxidase Hpx	Cytoplasmic	3540311	435	-	C	A	Leu	Phe	nsSNP
23921	Rv3172c	15610308	-		-	hypothetical protein	Unknown	3541237	128	-	T	A	Lys	Ile	nsSNP
23941	Rv3192	15610328	COG2141C	C	-	hypothetical protein	Unknown	3559759	197	+	G	A	Trp	Ter	nsSNP
23944	Rv3195	15610331	COG5282S	S	-	hypothetical protein	Cytoplasmic	3564737	374	+	G	C	Gly	Ala	nsSNP
23953	Rv3201c	15610337	COG0210L	L	-	ATP-dependent DNA helicase	Cytoplasmic	3574504	2533	-	G	A	Arg	Trp	nsSNP
23954	Rv3202c	15610338	COG2887L	L	-	ATP-dependent DNA helicase	Cytoplasmic	3577864	2337	-	A	C	Gly	Gly	synonymous
23960	Rv3208	15610344	COG1309K	K	-	TetR family transcriptional regulator	Cytoplasmic	3585577	574	+	T	C	Cys	Arg	nsSNP
23965	Rv3212	15610348	-		-	hypothetical protein	Unknown	3589537	144	+	C	T	Pro	Pro	synonymous
24022	Rv3266c	15610402	COG1091M	M	rmlD	dTDP-6-deoxy-L-lyxo-4-hexulose reductase RmlD	Cytoplasmic	3646964	846	-	C	G	Leu	Leu	synonymous
24041	Rv3285	15610421	COG4770I	I	accA3	bifunctional acetyl-/propionyl-coenzyme A carboxylase subunit alpha	Cytoplasmic	3666905	549	+	C	T	Thr	Thr	synonymous
24055	Rv3299c	15610435	COG3119P	P	atsB	arylsulfatase AtsB	Cytoplasmic	3685101	863	-	C	G	Gly	Ala	nsSNP
24076	Rv3319	15610455	COG0479C	C	sdhB	succinate dehydrogenase iron-sulfur subunit	Cytoplasmic Membrane	3707164	393	+	G	T	Leu	Leu	synonymous
24084	Rv3327	15610463	COG2128S	S	-	transposase	Cytoplasmic	3711910	162	+	G	A	Trp	Ter	nsSNP
24084	Rv3327	15610463	COG2128S	S	-	transposase	Cytoplasmic	3712145	397	+	G	A	Asp	Asn	nsSNP
24084	Rv3327	15610463	COG2128S	S	-	transposase	Cytoplasmic	3712372	624	+	A	G	Leu	Leu	synonymous
24084	Rv3327	15610463	COG2128S	S	-	transposase	Cytoplasmic	3712522	774	+	A	C	Ala	Ala	synonymous
24100	Rv3343c	57117092	COG5651N	N	PPE54	PPE family protein	Cytoplasmic Membrane	3731461	5475	-	C	G	Thr	Thr	synonymous
24100	Rv3343c	57117092	COG5651N	N	PPE54	PPE family protein	Cytoplasmic Membrane	3732089	4847	-	C	T	Gly	Asp	nsSNP
24100	Rv3343c	57117092	COG5651N	N	PPE54	PPE family protein	Cytoplasmic Membrane	3732113	4823	-	C	G	Arg	Thr	nsSNP
24100	Rv3343c	57117092	COG5651N	N	PPE54	PPE family protein	Cytoplasmic Membrane	3732114	4822	-	G	T	Arg	Thr	nsSNP
24100	Rv3343c	57117092	COG5651N	N	PPE54	PPE family protein	Cytoplasmic Membrane	3736276	660	-	G	A	Gly	Gly	synonymous
24100	Rv3343c	57117092	COG5651N	N	PPE54	PPE family protein	Cytoplasmic Membrane	3736282	654	-	G	A	Asn	Asn	synonymous
24100	Rv3343c	57117092	COG5651N	N	PPE54	PPE family protein	Cytoplasmic Membrane	3736286	650	-	T	A	Tyr	Phe	nsSNP
24100	Rv3343c	57117092	COG5651N	N	PPE54	PPE family protein	Cytoplasmic Membrane	3736288	648	-	G	C	Ser	Gly	nsSNP
24100	Rv3343c	57117092	COG5651N	N	PPE54	PPE family protein	Cytoplasmic Membrane	3736290	646	-	T	C	Ser	Gly	nsSNP
24100	Rv3343c	57117092	COG5651N	N	PPE54	PPE family protein	Cytoplasmic Membrane	3736291	645	-	C	A	Gly	Gly	synonymous
24100	Rv3343c	57117092	COG5651N	N	PPE54	PPE family protein	Cytoplasmic Membrane	3736303	633	-	G	C	Ala	Ala	synonymous
24100	Rv3343c	57117092	COG5651N	N	PPE54	PPE family protein	Cytoplasmic Membrane	3736306	630	-	C	A	Gly	Gly	synonymous
24104	Rv3347c	57117095	COG5651N	N	PPE55	PPE family protein	Cytoplasmic Membrane	3750969	2216	-	C	T	Gly	Glu	nsSNP
24154	Rv3396c	15610532	COG0519F	F	guaA	GMP synthase	Cytoplasmic	3813712	367	-	G	A	Leu	Phe	nsSNP
24186	Rv3428c	15610564	COG4584L	L	-	transposase	Cytoplasmic Membrane	3844992	979	-	T	A	Ser	Cys	nsSNP
24187	Rv3429	57117107	COG5651N	N	PPE59	PPE family protein	Unknown	3847169	5	+	A	T	His	Phe	nsSNP
24187	Rv3429	57117107	COG5651N	N	PPE59	PPE family protein	Unknown	3847174	10	+	A	T	Met	Leu	nsSNP
24187	Rv3429	57117107	COG5651N	N	PPE59	PPE family protein	Unknown	3847178	14	+	T	C	Ile	Thr	nsSNP
24187	Rv3429	57117107	COG5651N	N	PPE59	PPE family protein	Unknown	3847186	22	+	G	C	Glu	His	nsSNP
24187	Rv3429	57117107	COG5651N	N	PPE59	PPE family protein	Unknown	3847188	24	+	G	C	Glu	His	nsSNP
24187	Rv3429	57117107	COG5651N	N	PPE59	PPE family protein	Unknown	3847189	25	+	T	C	Tyr	Gln	nsSNP
24187	Rv3429	57117107	COG5651N	N	PPE59	PPE family protein	Unknown	3847191	27	+	T	G	Tyr	Gln	nsSNP
24187	Rv3429	57117107	COG5651N	N	PPE59	PPE family protein	Unknown	3847198	34	+	A	T	Asn	Tyr	nsSNP
24187	Rv3429	57117107	COG5651N	N	PPE59	PPE family protein	Unknown	3847201	37	+	A	C	Ile	Gln	nsSNP
24187	Rv3429	57117107	COG5651N	N	PPE59	PPE family protein	Unknown	3847202	38	+	T	A	Ile	Gln	nsSNP
24187	Rv3429	57117107	COG5651N	N	PPE59	PPE family protein	Unknown	3847206	42	+	A	G	Ile	Met	nsSNP
24187	Rv3429	57117107	COG5651N	N	PPE59	PPE family protein	Unknown	3847211	47	+	A	C	Glu	Ala	nsSNP
24187	Rv3429	57117107	COG5651N	N	PPE59	PPE family protein	Unknown	3847212	48	+	A	C	Glu	Ala	nsSNP
24192	Rv3434c	15610570	-		-	transmembrane protein	Cytoplasmic Membrane	3853639	290	-	G	A	Ala	Val	nsSNP
24205	Rv3447c	15610583	COG1674D	D	-	hypothetical protein	Cytoplasmic Membrane	3867404	835	-	C	A	Glu	Ter	nsSNP
24206	Rv3448	15610584	-		-	integral membrane protein	Cytoplasmic Membrane	3868379	28	+	C	T	Arg	Trp	nsSNP
24206	Rv3448	15610584	-		-	integral membrane protein	Cytoplasmic Membrane	3869352	1001	+	C	T	Ala	Val	nsSNP
24208	Rv3450c	15610586	-		-	hypothetical protein	Cytoplasmic Membrane	3871880	617	-	G	A	Pro	Leu	nsSNP
24212	Rv3454	15610590	COG1457F	F	-	integral membrane protein	Cytoplasmic Membrane	3875017	196	+	G	T	Gly	Ter	nsSNP
24212	Rv3454	15610590	COG1457F	F	-	integral membrane protein	Cytoplasmic Membrane	3875230	409	+	A	G	Thr	Ala	nsSNP
24240	Rv3482c	15610618	-		-	hypothetical protein	Unknown	3901772	335	-	G	T	Thr	Asn	nsSNP
24256	Rv3498c	15610634	COG1463Q	Q	mce4B	MCE-family protein MCE4B	Unknown	3917305	694	-	C	A	Val	Phe	nsSNP
24291	Rv3533c	57117121	COG5651N	N	PPE62	PPE family protein	Cytoplasmic Membrane	3971125	1329	-	C	T	Thr	Thr	synonymous
24297	Rv3539	57117123	COG5651N	N	PPE63	PPE family protein	Cytoplasmic Membrane	3978697	639	+	G	A	Ala	Ala	synonymous
24317	Rv3559c	15610695	COG1028IQR	IQR	-	short chain dehydrogenase	Cytoplasmic	3999707	729	-	G	A	Ala	Ala	synonymous
24324	Rv3566c	57117125	COG2162Q	Q	nat	arylamine n-acetyltransferase nat (arylamine acetylase)	Cytoplasmic	4007595	588	-	G	A	Ala	Ala	synonymous
24333	Rv3574	15610710	COG1309K	K	-	transcriptional regulatory protein TetR-family	Cytoplasmic Membrane	4016738	255	+	C	G	Ala	Ala	synonymous
24368	Rv3609c	15610745	COG0302H	H	folE	GTP cyclohydrolase I	Unknown	4050052	534	-	C	T	Thr	Thr	synonymous
24377	Rv3618	15610754	COG2141C	C	-	monooxygenase	Cytoplasmic	4059257	560	+	G	A	Gly	Asp	nsSNP
24394	Rv3635	15610771	-		-	transmembrane protein	Cytoplasmic Membrane	4073918	285	+	G	A	Leu	Leu	synonymous
24399	Rv3640c	15610776	COG3328L	L	-	transposase	Cytoplasmic	4079417	333	-	G	A	His	His	synonymous
24441	Rv3681c	57117144	-		whiB4	transcriptional regulatory protein WHIB-like WHIB4	Unknown	4121213	342	-	G	C	Thr	Thr	synonymous
24444	Rv3684	15610820	COG0031E	E	-	lyase	Unknown	4126282	844	+	C	T	Leu	Phe	nsSNP
24446	Rv3686c	15610822	-		-	hypothetical protein	Cytoplasmic Membrane	4128906	178	-	C	T	Ala	Thr	nsSNP
24448	Rv3688c	15610824	COG1610S	S	-	hypothetical protein	Cytoplasmic	4129917	441	-	C	A	Ser	Ser	synonymous
24458	Rv3698	15610834	-		-	hypothetical protein	Cytoplasmic	4141127	635	+	A	G	His	Arg	nsSNP
24475	Rv3714c	15610850	-		-	hypothetical protein	Cytoplasmic Membrane	4159589	233	-	G	A	Ala	Val	nsSNP
24484	Rv3723	15610859	-		-	transmembrane protein	Cytoplasmic Membrane	4168771	236	+	C	T	Ser	Leu	nsSNP
24489	Rv3727	15610863	COG3349S	S	-	oxidoreductase	Cytoplasmic	4174532	1578	+	G	A	Ala	Ala	synonymous
24501	Rv3739c	57117151	COG5651N	N	PPE67	PPE family protein	Cytoplasmic Membrane	4190459	59	-	G	A	Ala	Val	nsSNP
24515	Rv3753c	15610889	-		-	hypothetical protein	Cytoplasmic	4199739	483	-	G	T	Ile	Ile	synonymous
24528	Rv3766	15610902	-		-	hypothetical protein	Unknown	4212976	684	+	G	A	Ala	Ala	synonymous
24547	Rv3783	15610919	COG1682GM	GM	rfbD	O-antigen/lipopolysaccharide transport integral membrane protein ABC transporter RfbD	Cytoplasmic Membrane	4230033	776	+	T	C	Val	Ala	nsSNP
24559	Rv3795	15610931	-		embB	integral membrane indolylacetylinositol arabinosyltransferase EMBB (arabinosylindolylacetylinositol synthase)	Cytoplasmic Membrane	4247431	918	+	G	A	Met	Ile	nsSNP
24559	Rv3795	15610931	-		embB	integral membrane indolylacetylinositol arabinosyltransferase EMBB (arabinosylindolylacetylinositol synthase)	Cytoplasmic Membrane	4249007	2494	+	C	T	Pro	Ser	nsSNP
24559	Rv3795	15610931	-		embB	integral membrane indolylacetylinositol arabinosyltransferase EMBB (arabinosylindolylacetylinositol synthase)	Cytoplasmic Membrane	4249594	3081	+	G	A	Thr	Thr	synonymous
24564	Rv3800c	15610936	COG3321Q	Q	pks13	polyketide synthase PKS13	Cytoplasmic Membrane	4260155	992	-	G	A	Ala	Val	nsSNP
24568	Rv3804c	15610940	COG0627R	R	fbpA	secreted antigen 85-A FBPA (Mycolyl transferase 85A) (fibronectin-binding protein A) (antigen 85 complex A)	Extracellular	4266346	313	-	C	T	Asp	Asn	nsSNP
24579	Rv3815c	15610951	COG0204I	I	-	acyltransferase	Cytoplasmic	4280072	717	-	C	A	Ala	Ala	synonymous
24582	Rv3818	15610954	COG2220R	R	-	hypothetical protein	Cytoplasmic	4282931	483	+	G	C	Val	Val	synonymous
24587	Rv3823c	15610959	COG2409R	R	mmpL8	integral membrane transport protein	Cytoplasmic Membrane	4291449	81	-	A	C	Gly	Gly	synonymous
24593	Rv3829c	15610965	COG1233Q	Q	-	dehydrogenase	Cytoplasmic	4304293	716	-	G	A	Thr	Ile	nsSNP
24599	Rv3835	15610971	-		-	hypothetical protein	Cytoplasmic Membrane	4309617	571	+	G	T	Ala	Ser	nsSNP
24600	Rv3836	15610972	COG3824S	S	-	hypothetical protein	Cytoplasmic	4310449	49	+	G	A	Ala	Thr	nsSNP
24600	Rv3836	15610972	COG3824S	S	-	hypothetical protein	Cytoplasmic	4310555	155	+	G	C	Gly	Ala	nsSNP
24614	Rv3850	15610986	-		-	hypothetical protein	Cytoplasmic	4324042	28	+	C	T	Arg	Cys	nsSNP
24623	Rv3859c	15610995	COG0069E	E	gltB	ferredoxin-dependent glutamate synthase [NADPH] large subunit	Cytoplasmic Membrane	4333703	2379	-	C	T	Leu	Leu	synonymous
24641	Rv3877	15611013	-		-	transmembrane protein	Cytoplasmic Membrane	4355141	135	+	A	C	Glu	Asp	nsSNP
24646	Rv3882c	15611018	-		-	hypothetical protein	Cytoplasmic	4362735	686	-	T	C	Asp	Gly	nsSNP
24658	Rv3894c	15611030	COG1674D	D	-	hypothetical protein	Cytoplasmic Membrane	4376445	4008	-	G	A	Pro	Pro	synonymous
24667	Rv3903c	15611039	-		-	hypothetical protein	Unknown	4388730	1703	-	T	C	Gln	Arg	nsSNP
24667	Rv3903c	15611039	-		-	hypothetical protein	Unknown	4390391	42	-	C	G	Ala	Ala	synonymous
24673	Rv3909	15611045	-		-	hypothetical protein	Cytoplasmic Membrane	4394744	553	+	G	C	Val	Leu	nsSNP
24681	Rv3917c	57117170	COG1475K	K	parB	chromosome partitioning protein ParB	Cytoplasmic	4406116	376	-	C	A	Ala	Ser	nsSNP
