# Supplementary material for: Comparative Genomic Analysis of Mycobacterium tuberculosis Drug Resistant Strains from Russia
Source: PLoS One. 2013 Feb 20;8(2):e56577. doi: 10.1371/journal.pone.0056577 (PMC3577857; doi:10.1371/journal.pone.0056577)
Supplement: Table S4 — Significant mutations characteristic for CTRI-4(XDR) isolate. (XLSX) [file pone.0056577.s004.xlsx]

## Sheet: Лист1
Table S4. Significant mutations characteristic for CTRI-4(XDR) isolate
Gene	COG Group	Gene name	Product	aa substitution	dissimilarity index1	shared with
Rv1368		lprF	lipoprotein LprF	Arg136Leu	-2	unique
Rv3887c		-	transmembrane protein	Asp336Gly	-1	R1207, 02_1987
Rv2198c		mmpS3	membrane protein	Gln296Arg	1	unique
Rv2341		lppQ	lipoprotein LppQ	Glu68Ala	-1	R1207, 02_1987
Rv3016		lpqA	lipoprotein LpqA	Ile17Thr	-1	R1207, 02_1987
Rv3795		embB	arabinosylindolylacetylinositol synthase	Met306Val	1	W148
Rv3630		-	integral membrane protein	Trp195Arg	-3	unique
Rv0954		-	transmembrane protein	Tyr223Asp	-3	R1207, 02_1987
Rv2563		-	glutamine-transport transmembrane protein ABC transporter	Val310Leu	1	R1207, 02_1987
Rv3158	C	nuoN	NADH dehydrogenase subunit N	Ala362Ser	1	R1207
Rv1552	C	frdA	fumarate reductase flavoprotein subunit	Asp303Gly	-1	R1207, 02_1987
Rv0066c	C	icd2	isocitrate dehydrogenase	Asp374Ala	-2	unique
Rv3107c	C	agpS	alkyldihydroxyacetonephosphate synthase AgpS	Thr362Ile	-1	unique
Rv0017c	D	rodA	cell division protein RodA	Phe28Val	-1	unique
Rv3918c	D	parA	chromosome partitioning protein ParA	Ser138Phe	-2	unique
Rv3710	E	leuA	2-isopropylmalate synthase	Gly489Arg	-2	unique
Rv3341	E	metX	homoserine O-acetyltransferase	Ser4Phe	-2	unique
Rv1704c	E	cycA	D-serine/alanine/glycine transporter protein CycA	Ser78Leu	-2	unique
Rv2394	E	ggtB	gamma-glutamyltranspeptidase precursor	Val532Leu	1	unique
Rv1285	EH	cysD	sulfate adenylyltransferase subunit 2	Arg305Ala	-1	unique
Rv1285	EH	cysD	sulfate adenylyltransferase subunit 2	Arg305Ala	-1	unique
Rv2764c	F	thyA	thymidylate synthase	Asp117Gly	-1	unique
Rv1692	G	-	phosphatase	Pro270Leu	-3	unique
Rv0237	G	lpqI	lipoprotein LpqI	Thr188Pro	-1	R1207, 02_1987
Rv1589	H	bioB	biotin synthase	Arg66Gly	-2	R1207
Rv2607	H	pdxH	pyridoxamine 5'-phosphate oxidase	Asp84Asn	1	unique
Rv0989c	H	grcC2	polyprenyl-diphosphate synthase	Leu257Met	2	R1207, 02_1987
Rv0567	H	-	methyltransferase/methylase	Ser76Cys	-1	unique
Rv3206c	H	moeB1	molybdopterin biosynthesis-like protein MoeZ	Thr57Pro	-1	unique
Rv0222	I	echA1	enoyl-CoA hydratase	Ala248Ser	1	unique
Rv1715	I	fadB3	3-hydroxybutyryl-CoA dehydrogenase FADB3	Glu118Lys	1	unique
Rv1934c	I	fadE17	acyl-CoA dehydrogenase FADE17	Glu394Lys	1	unique
Rv1934c	I	fadE17	acyl-CoA dehydrogenase FADE17	Leu34Arg;	-2;	R1207
Rv3505	I	fadE27	acyl-CoA dehydrogenase FADE27	Ile325Leu	2	unique
Rv1142c	I	echA10	enoyl-CoA hydratase	Lys59Arg	2	unique
Rv3229c	I	-	linoleoyl-CoA desaturase	Thr339Met	-1	unique
Rv1715	I	fadB3	3-hydroxybutyryl-CoA dehydrogenase FADB3	Trp188Arg	-3	unique
Rv3554	I	fdxB	electron transfer protein FdxB	Val358Leu	1	unique
Rv0068	IQR	-	short chain dehydrogenase	Val214Leu	1	In almost all genomes
Rv1536	J	ileS	isoleucyl-tRNA synthetase	Ala353Glu	-1	unique
Rv0380c	J	-	RNA methyltransferase	Arg174Pro	-2	R1207, 02_1987
Rv1630	J	rpsA	30S ribosomal protein S1	Asp123Ala	-2	unique
Rv0710	J	rpsQ	30S ribosomal protein S17	Lys69Arg	2	unique
Rv0682	J	rpsL	30S ribosomal protein S12	Lys88Arg	2	unique
Rv0823c	J	-	transcriptional regulatory protein	Thr218Met	-1	unique
Rv0165c	K	-	GntR family transcriptional regulator	Ala231Glu	-1	unique
Rv0667	K	rpoB	DNA-directed RNA polymerase subunit beta	Asp435Val	-3	R1207
Rv3828c	L	-	resolvase	Ala158Pro	-1	R1207, 02_1987
Rv1547	L	dnaE	DNA polymerase III subunit alpha	Ser898Leu	-2	R1207, 02_1987
Rv3428c	L	-	transposase	Tyr301Stop		unique
Rv0944	L	-	formamidopyrimidine-DNA glycosylase	Tyr50His	2	R1207, 02_1987
Rv3273	P	-	transmembrane carbonic anhydrase	Leu725Pro	-3	unique
Rv1707	P	-	transmembrane protein	Pro186Ser	-1	R1207, 02_1987
Rv1908c	P	katG	catalase-peroxidase-peroxynitritase T KATG	Ser315Thr	1	W148, R1207
Rv0892	P	-	monooxygenase	Thr177Ile	-1	R1207, 02_1987
Rv0654	Q	-	dioxygenase	Ala79Asp	-2	unique
Rv2946c	Q	pks1	polyketide synthase PKS1	Glu1174Stop		unique
Rv2043c	Q	pncA	pyrazinamidase/nicotinamidas PNCA	His51Pro	-2	unique
Rv1661	Q	pks7	polyketide synthase pks7	Leu2076Arg	-2	unique
Rv0136	Q	cyp138	cytochrome P450 138	Lys159Arg	2	R1207, 02_1987
Rv1153c	Q	omt	O-methyltransferase	Thr182Arg	-1	unique
Rv1911c	R	lppC	lipoprotein LppC	Arg160Gln	1	unique
Rv3729	R	-	transferase	Arg280Gln	1	unique
Rv3171c	R	hpx	non-Heme haloperoxidase Hpx	Arg290Gly	-2	unique
Rv0115	R	hddA	D-alpha-D-heptose-7-phosphate kinase	Asp309Gly	-1	unique
Rv1123c	R	bpoB	peroxidase BpoB	Glu185Lys	1	R1207, 02_1987
Rv0419	R	lpqM	lipoprotein peptidase LpqM	Glu253Gly	-2	R1207, 02_1987
Rv0646c	R	lipG	lipase/esterase LipG	Thr142Ser	1	unique
Rv2579	R	dhaA	haloalkane dehalogenase	Thr2Lys	-1	R1207, 02_1987
Rv3057c	R	-	short chain dehydrogenase	Val93Met	1	R1207, 02_1987
Rv1266c	RTKL	pknH	transmembrane serine/threonine-protein kinase H	Arg607Gln	1	In almost all genomes
Rv3245c	T	mtrB	two component sensory transduction histidine kinase MTRB	Val274Leu	1	unique
Rv0732	U	secY	preprotein translocase subunit SecY	His286Asn	1	R1207, 02_1987
Rv2586c	U	secF	preprotein translocase subunit SecF	Ile79Val	3	unique
Rv2688c	V	-	antibiotic ABC transporter ATP-binding protein	Cys216Arg	-3	R1207, 02_1987
Rv2959c	V	-	methyltransferase (methylase)	Ile146Met	1	R1207, 02_1987
Mutations conferring resistance to RIF, INH, PZA, EMB, and STR indicated by bold
Genes indicated by grey were sequenced for additional 14 XDR strains
